# Supplementary material
Source: publisher figshare collection journal article supplement (https://acs.figshare.com/ndownloader/files/5855835)

# Supplementary Information

## **Rhodium-Catalyzed Annulation of Primary Benzylamine with $\alpha$ -Diazo Ketone towards Isoquinoline**

Haoke Chu, Peiran Xue, Jin-Tao Yu and Jiang Cheng\*

*School of Petrochemical Engineering, Jiangsu Key Laboratory of Advanced Catalytic Materials & Technology, Jiangsu Province Key Laboratory of Fine Petrochemical Engineering, Changzhou University, Changzhou 213164, P. R. China*

Email: [jiangcheng@cczu.edu.cn](mailto:jiangcheng@cczu.edu.cn)

### **Table of Contents**

|                                                                                                |           |
|------------------------------------------------------------------------------------------------|-----------|
| <b>1. Mechanism</b>                                                                            | <b>S2</b> |
| <b>2. Copies of the <math>^1\text{H}</math> NMR and <math>^{13}\text{C}</math> NMR Spectra</b> | <b>S3</b> |

## 1. Mechanism

### 1.1 Detection of H<sub>2</sub>

A piece of filter paper soaked with the solution of phosphomolybdic acid/PdCl<sub>2</sub> is a sensitive detector of reducing gas, such as H<sub>2</sub> and CO.

The wet test paper turned dark blue when absorbing purified H<sub>2</sub> (Entry 1).

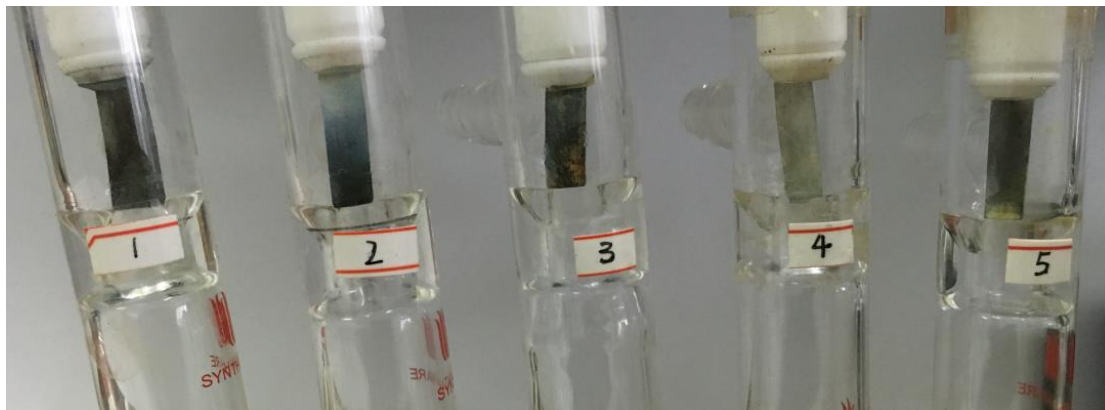

| Entry                                | 2   | 3              | 4   | 5   |
|--------------------------------------|-----|----------------|-----|-----|
| [Cp*RhCl <sub>2</sub> ] <sub>2</sub> | √   | √              | ×   | √   |
| AgSbF <sub>6</sub>                   | √   | √              | √   | ×   |
| Atmosphere                           | Air | N <sub>2</sub> | Air | Air |
| Color of paper                       | +   | +              | -   | +   |

“-” means negative result; “+” means positive result.

## 2. Copies of the $^1\text{H}$ NMR and $^{13}\text{C}$ NMR Spectra

### Ethyl 3-methylisoquinoline-4-carboxylate (3aa)

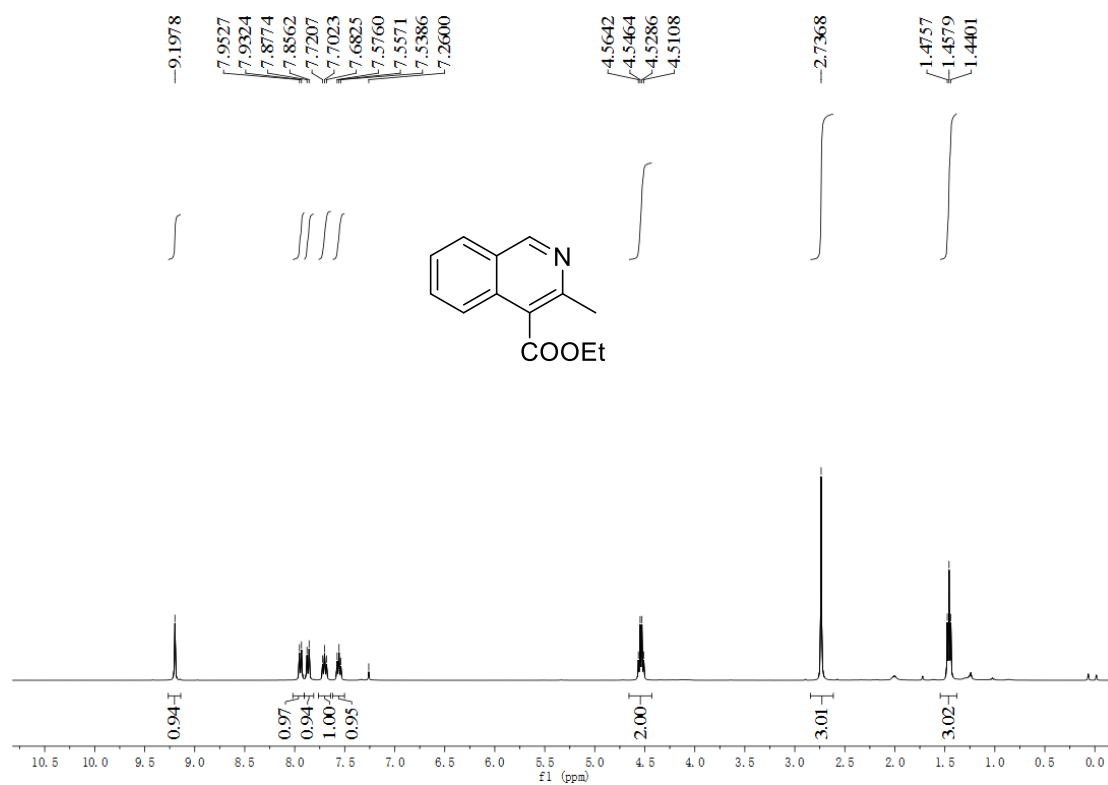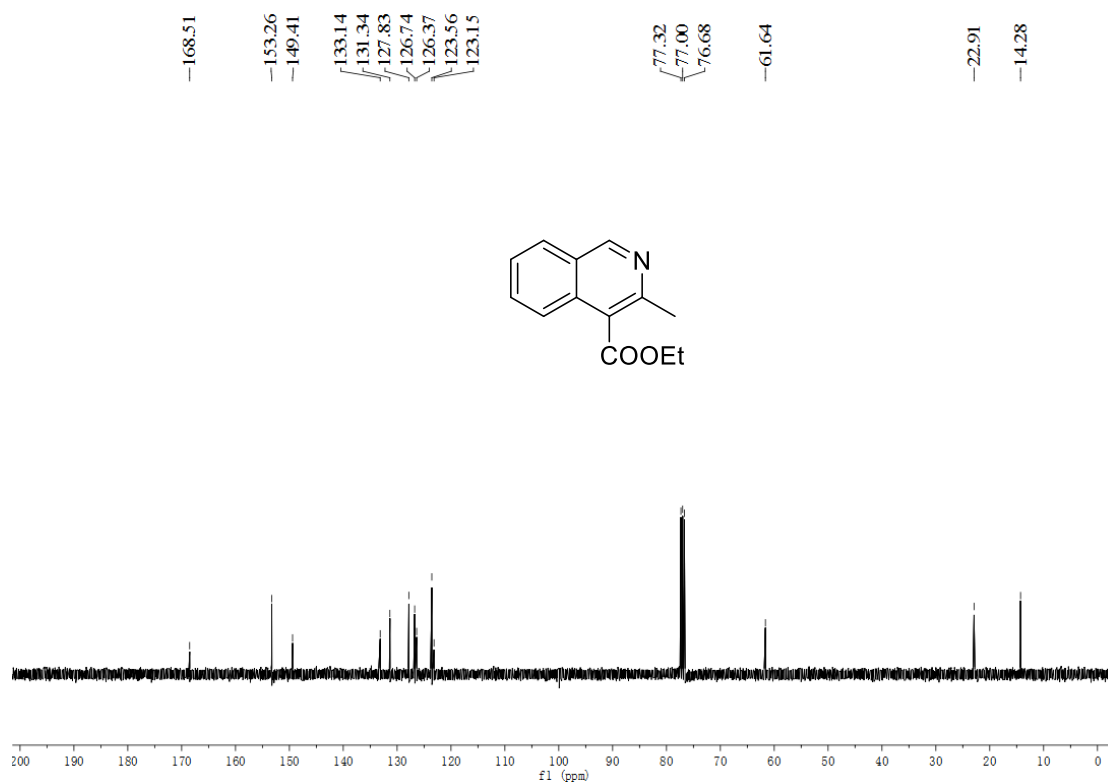

# **Ethyl 3,8-dimethylisoquinoline-4-carboxylate (3ba)**

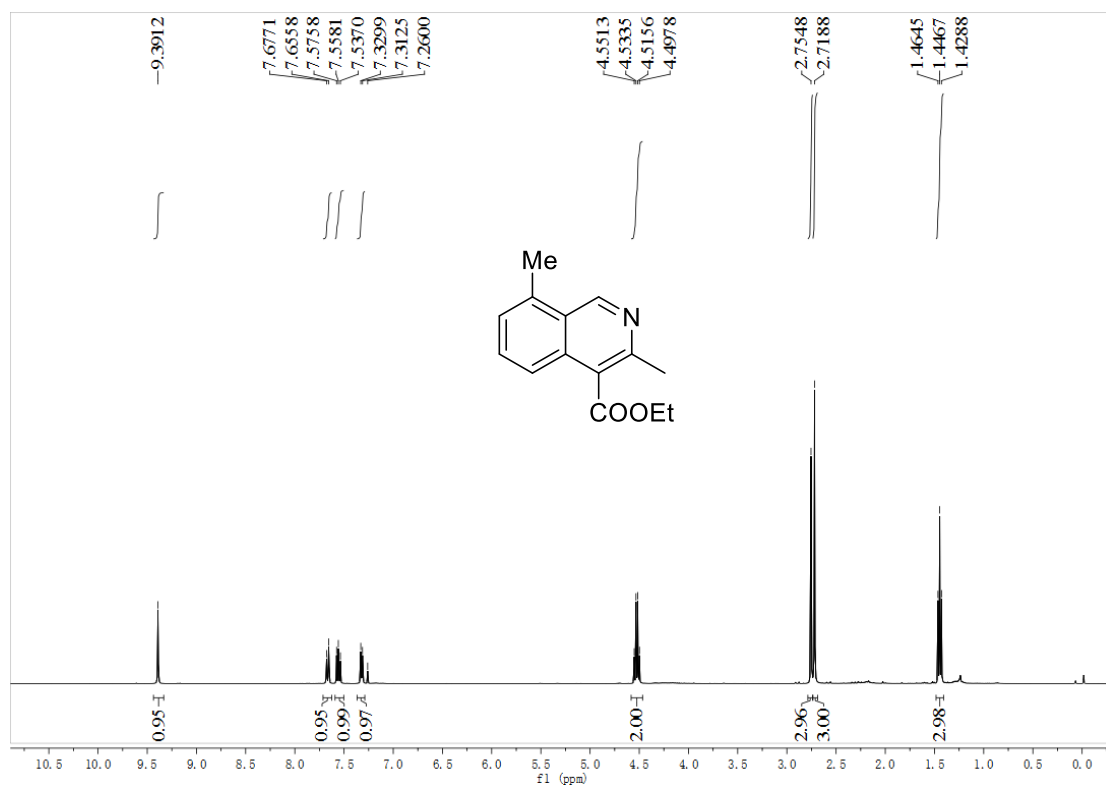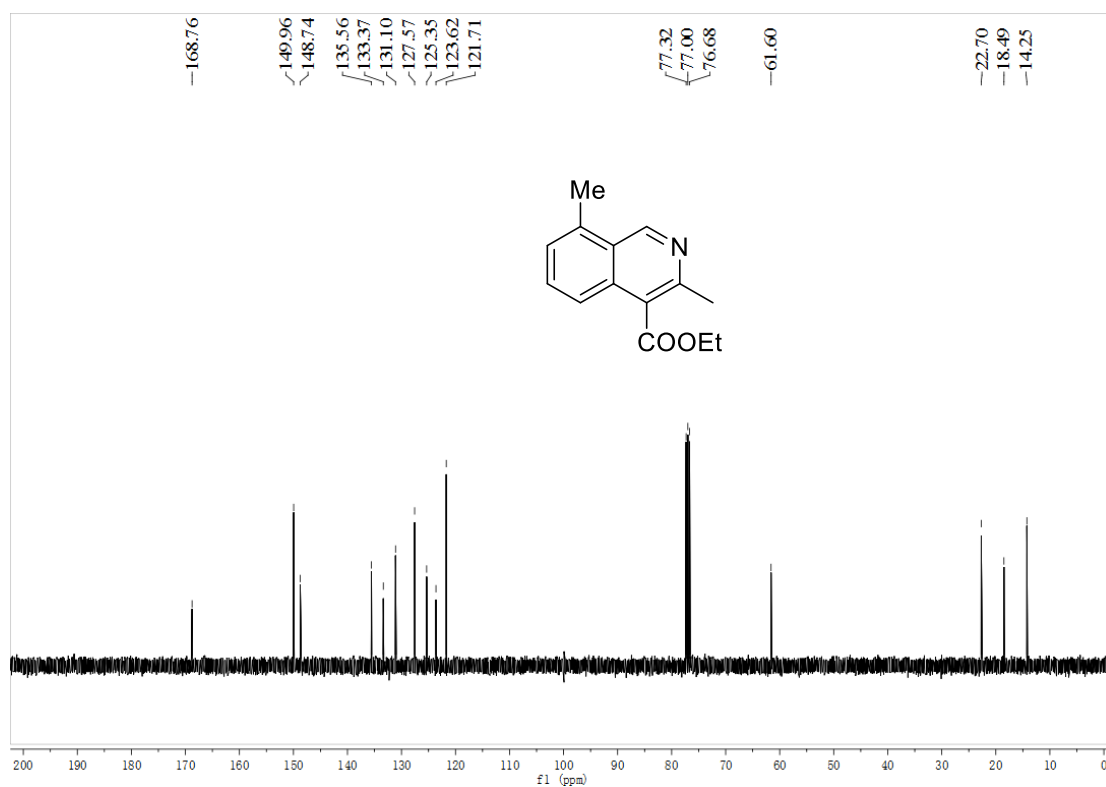

# **Ethyl 3,6-dimethyloisoquinoline-4-carboxylate (3ca)**

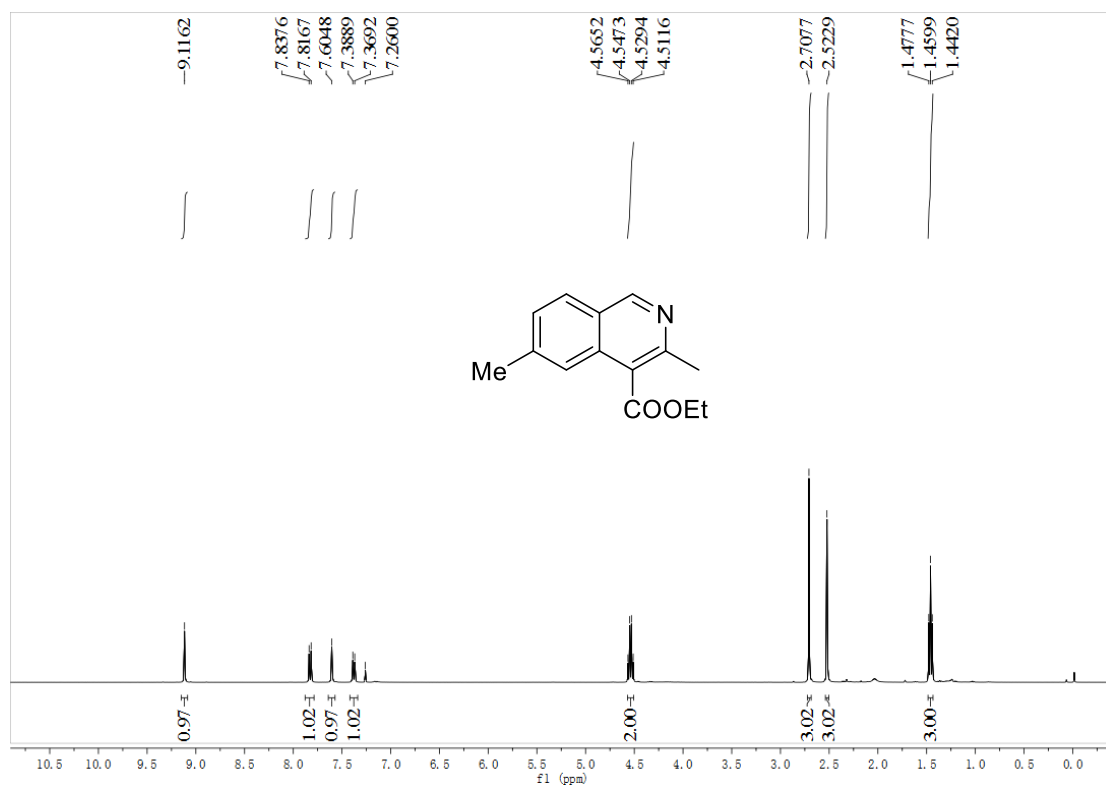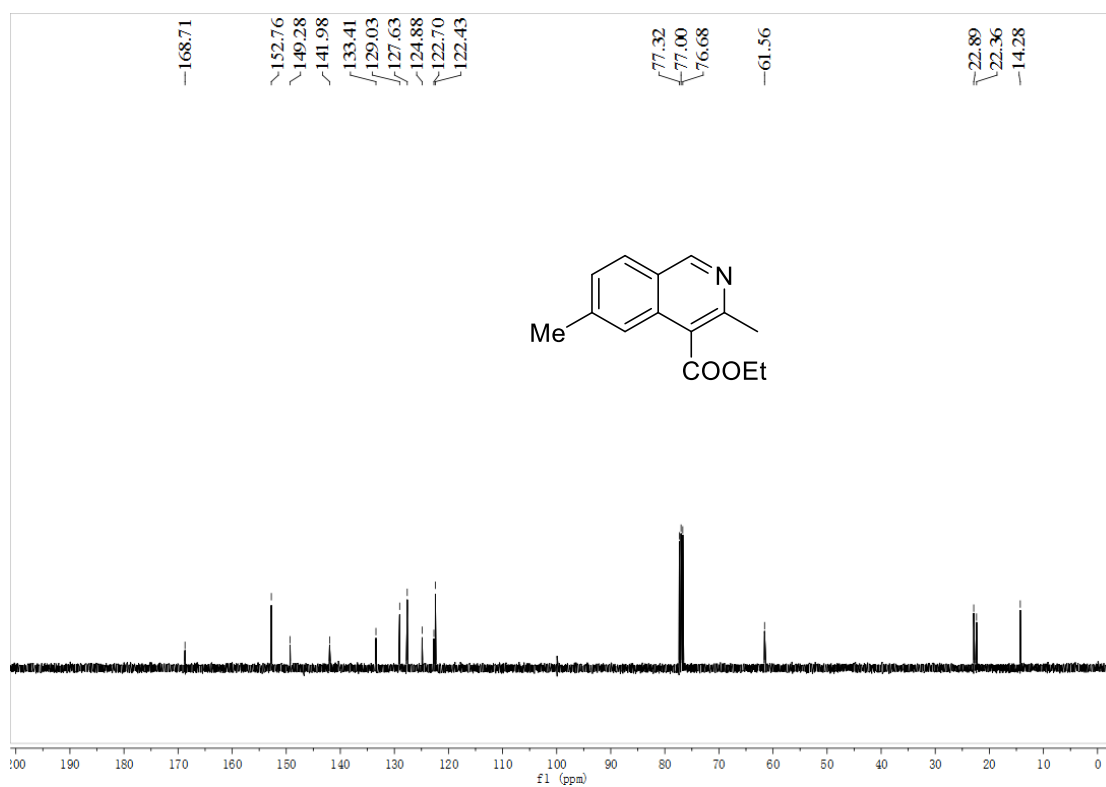

# **Ethyl 6-methoxy-3-methylisoquinoline-4-carboxylate (3da)**

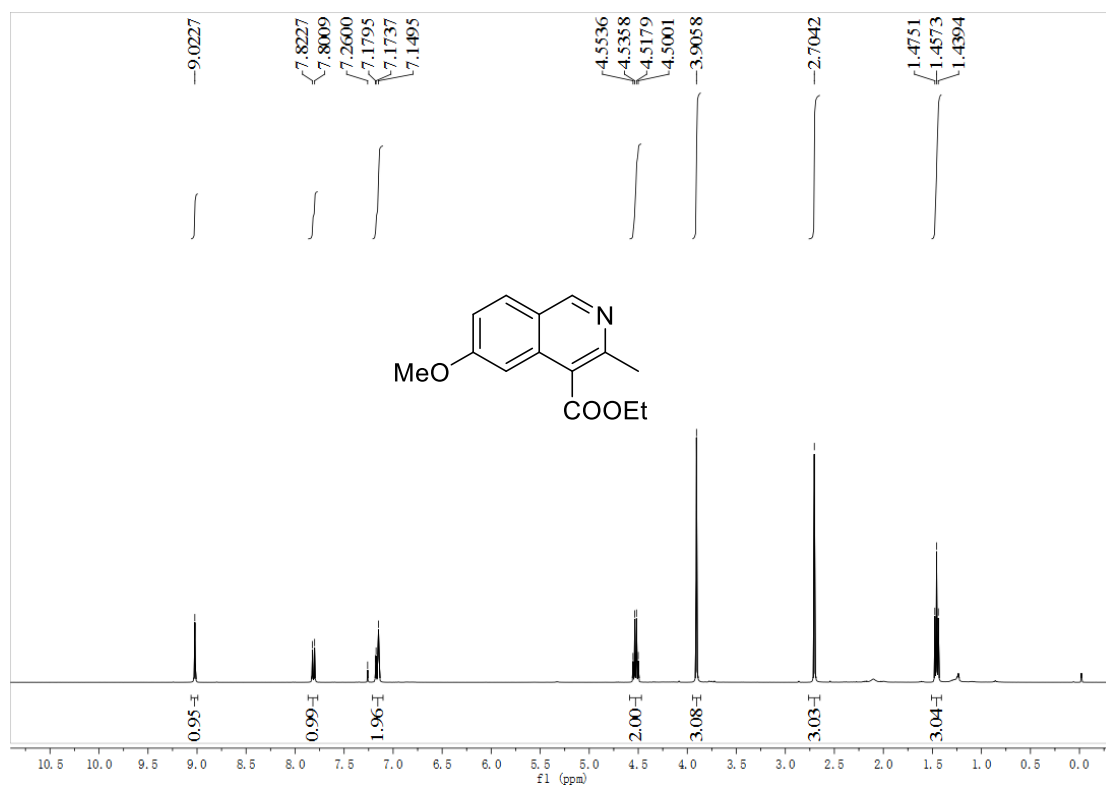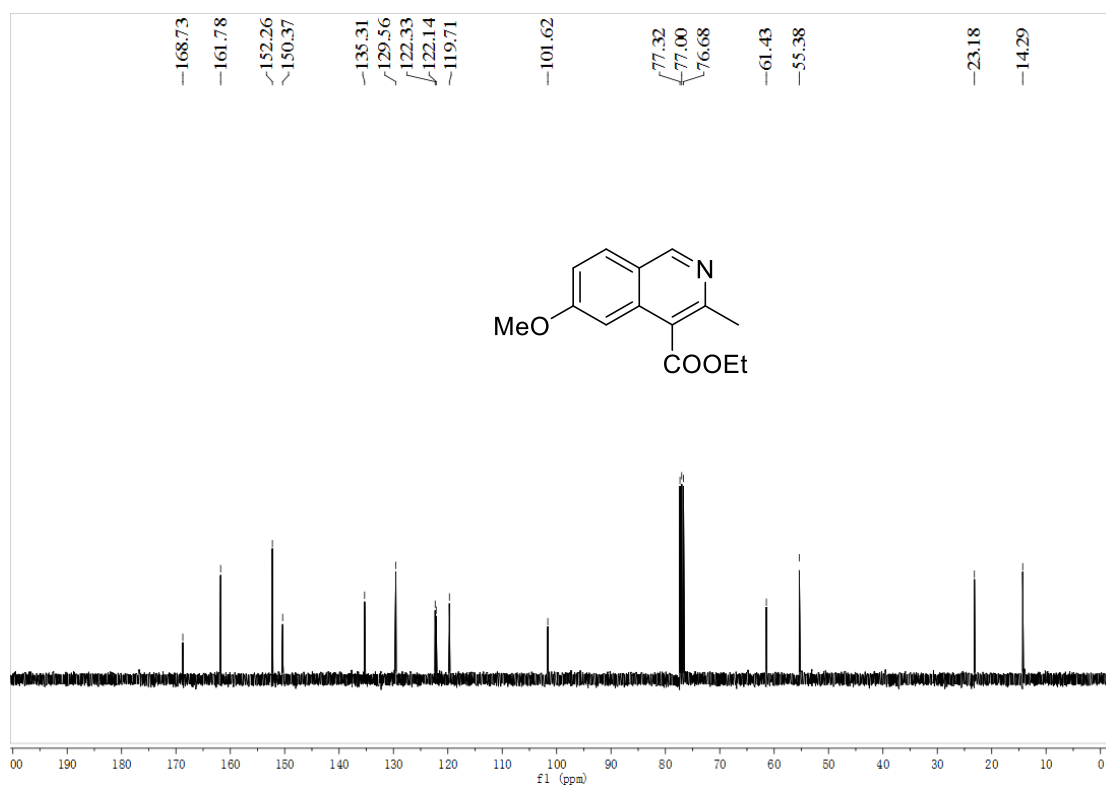

# **Ethyl 6-(tert-butyl)-3-methylisoquinoline-4-carboxylate (3ea)**

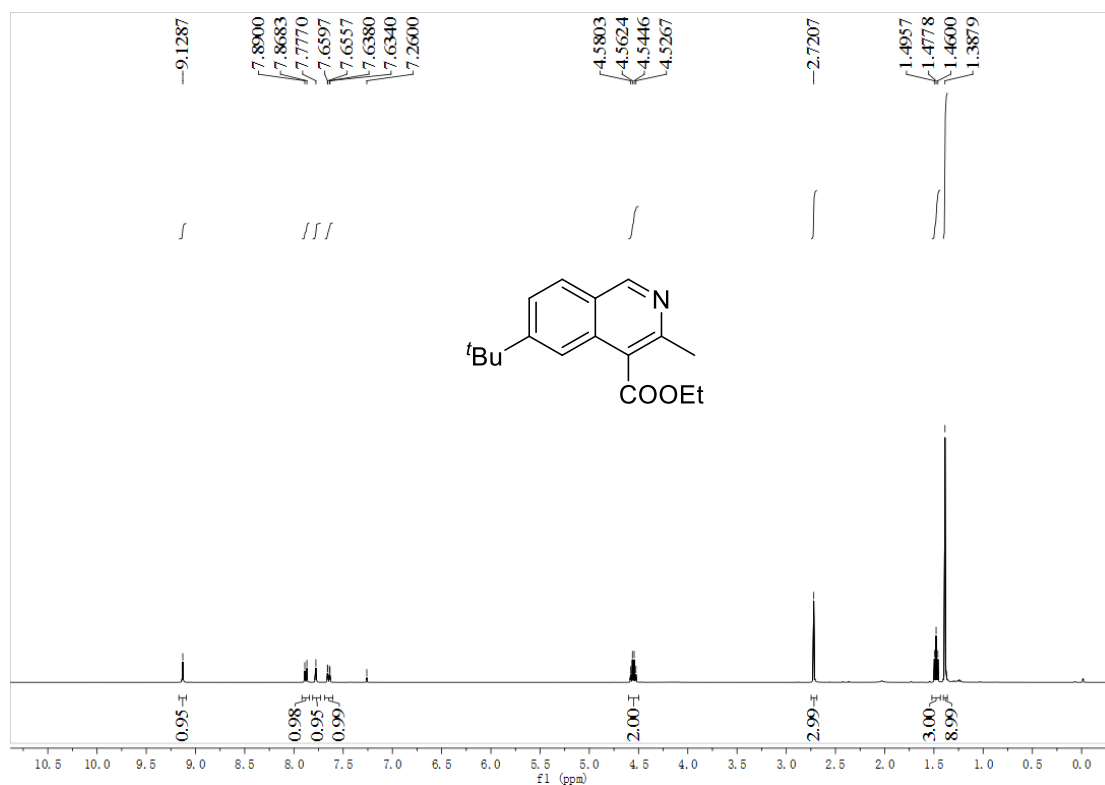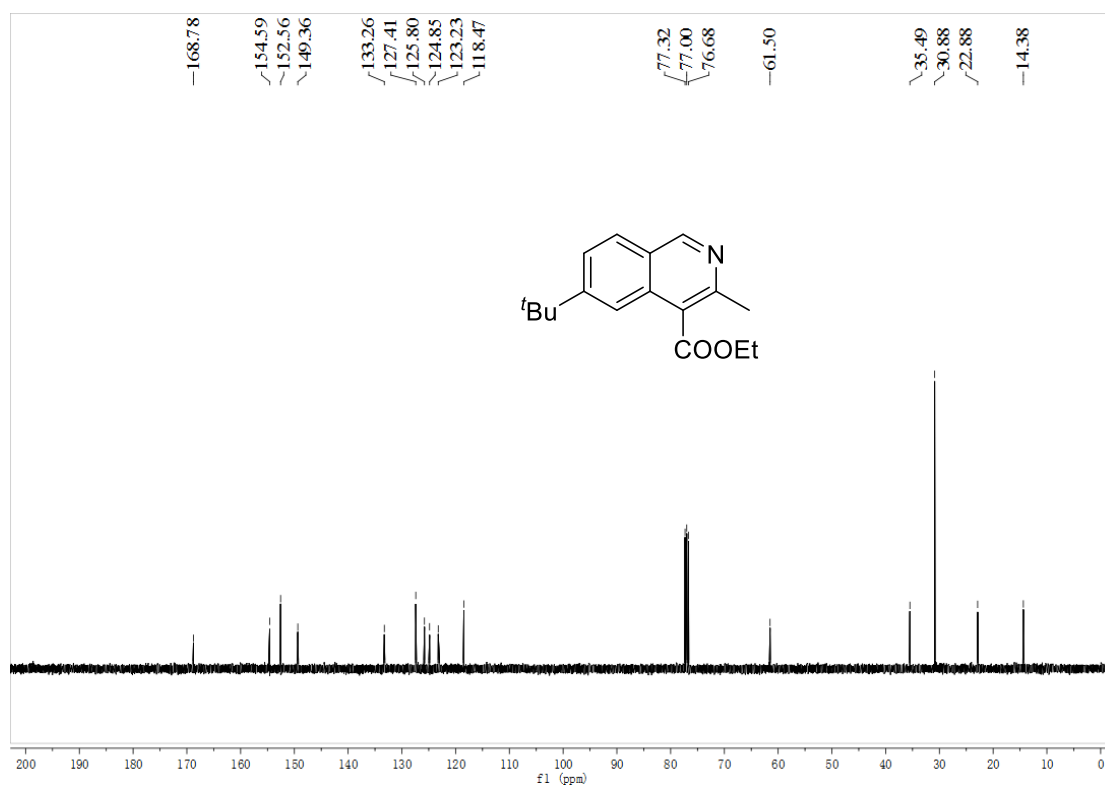

# **Ethyl 3-methyl-6-phenylisoquinoline-4-carboxylate (3fa)**

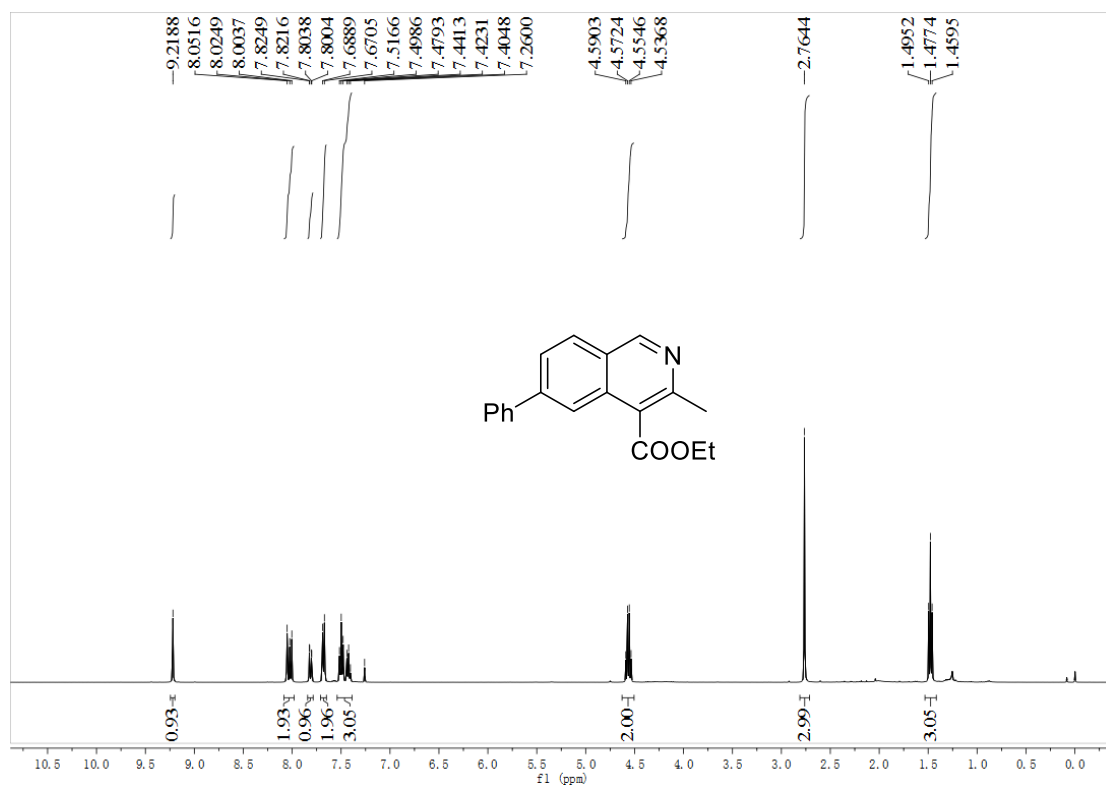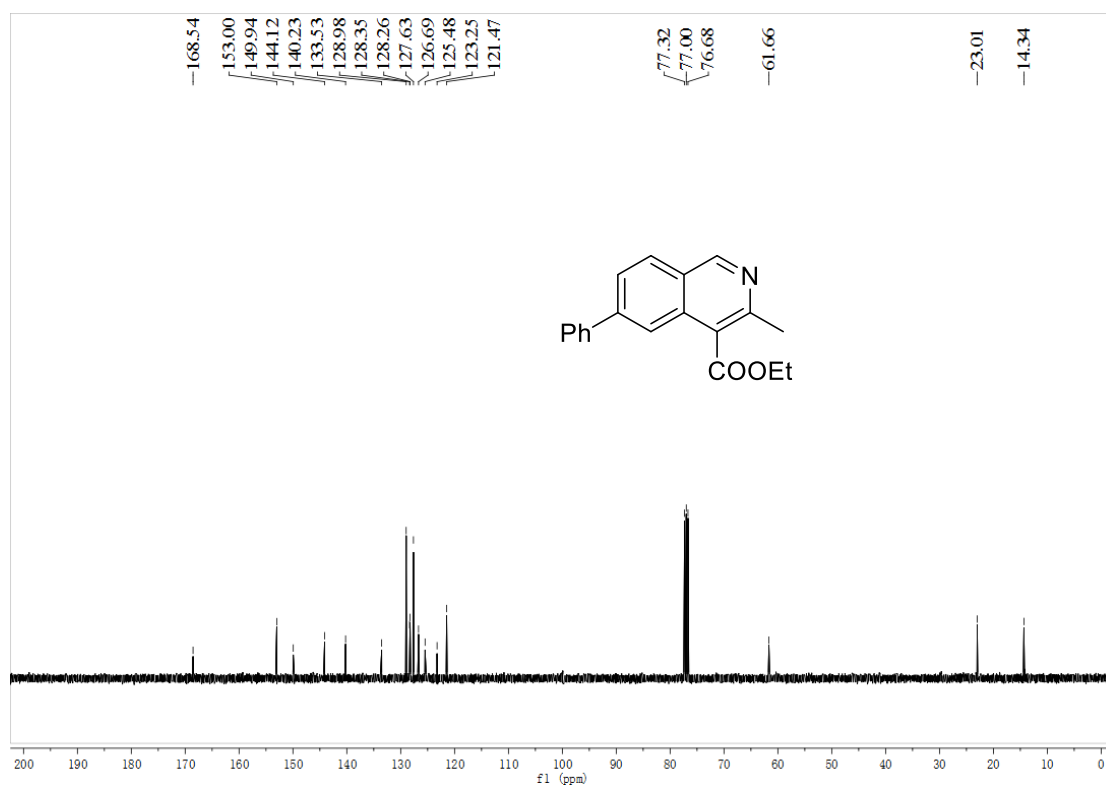

**Ethyl 6-bromo-3-methylisoquinoline-4-carboxylate (3ga):**

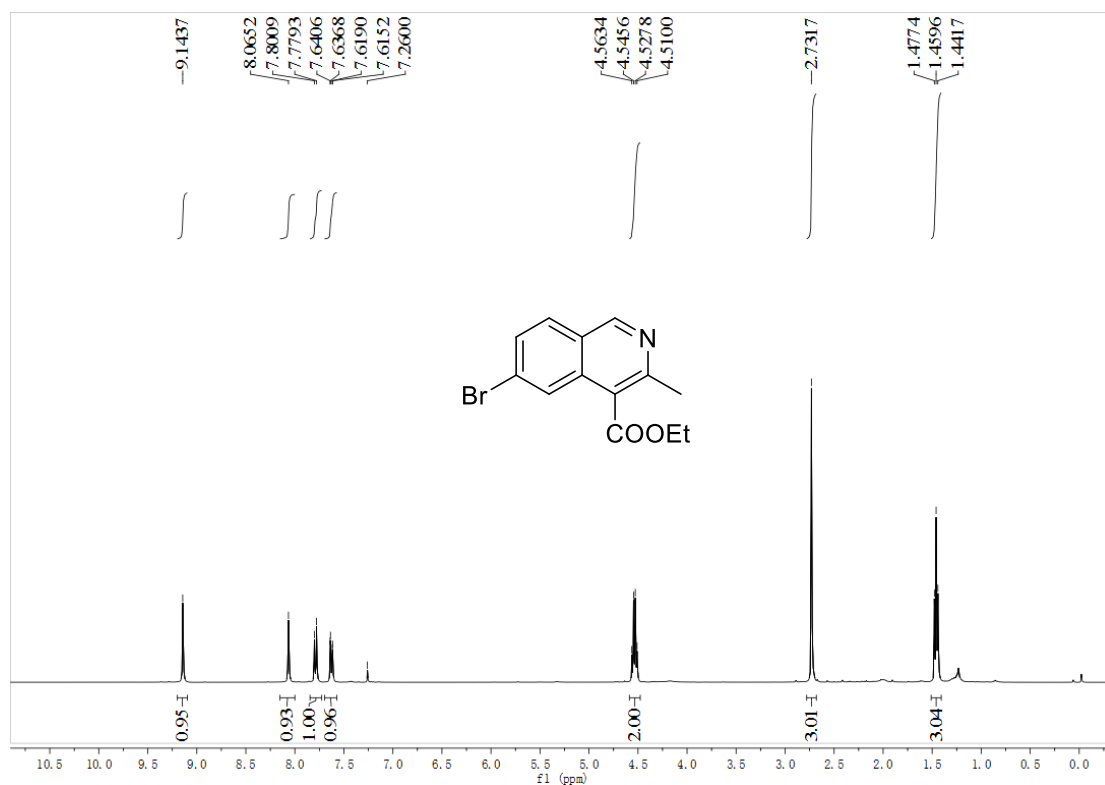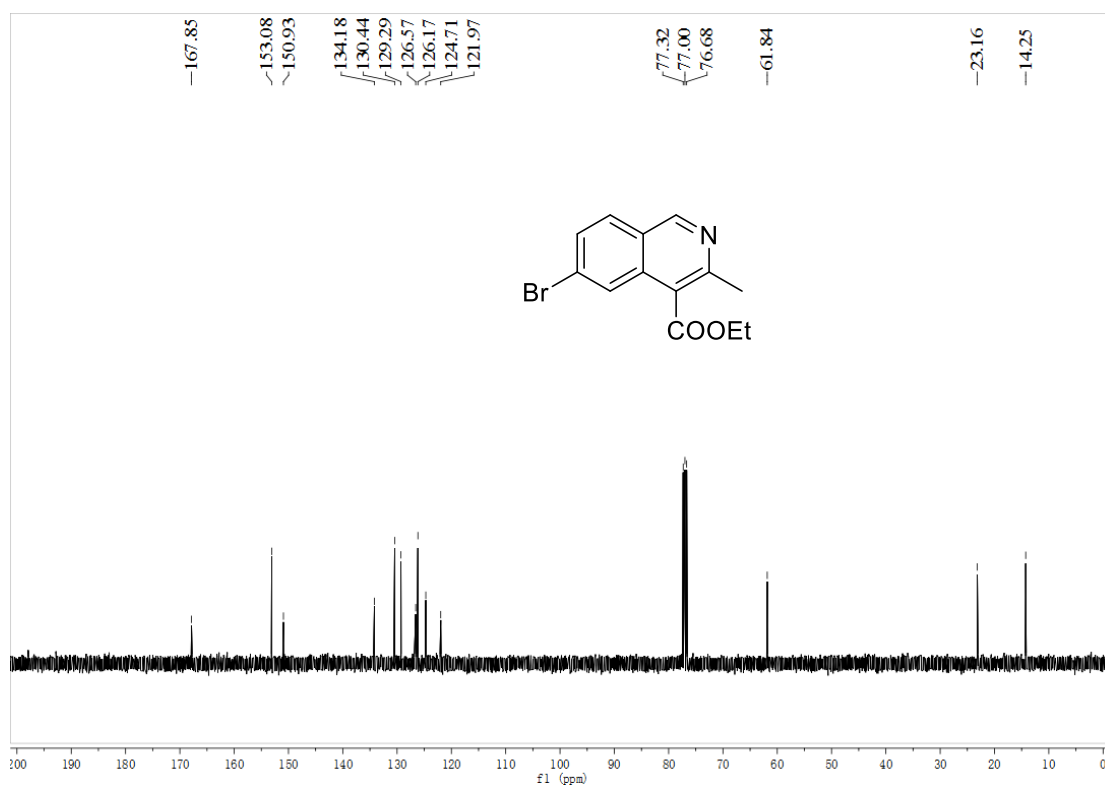

# **Ethyl 6-chloro-3-methylisoquinoline-4-carboxylate (3ha)**

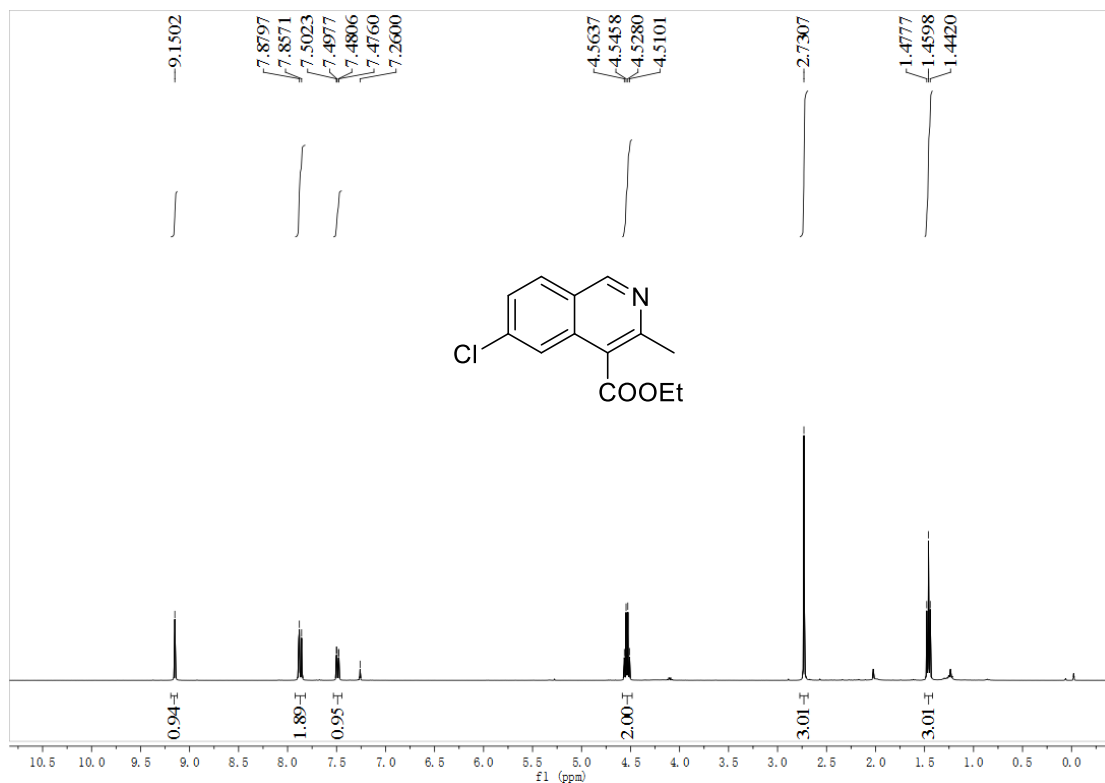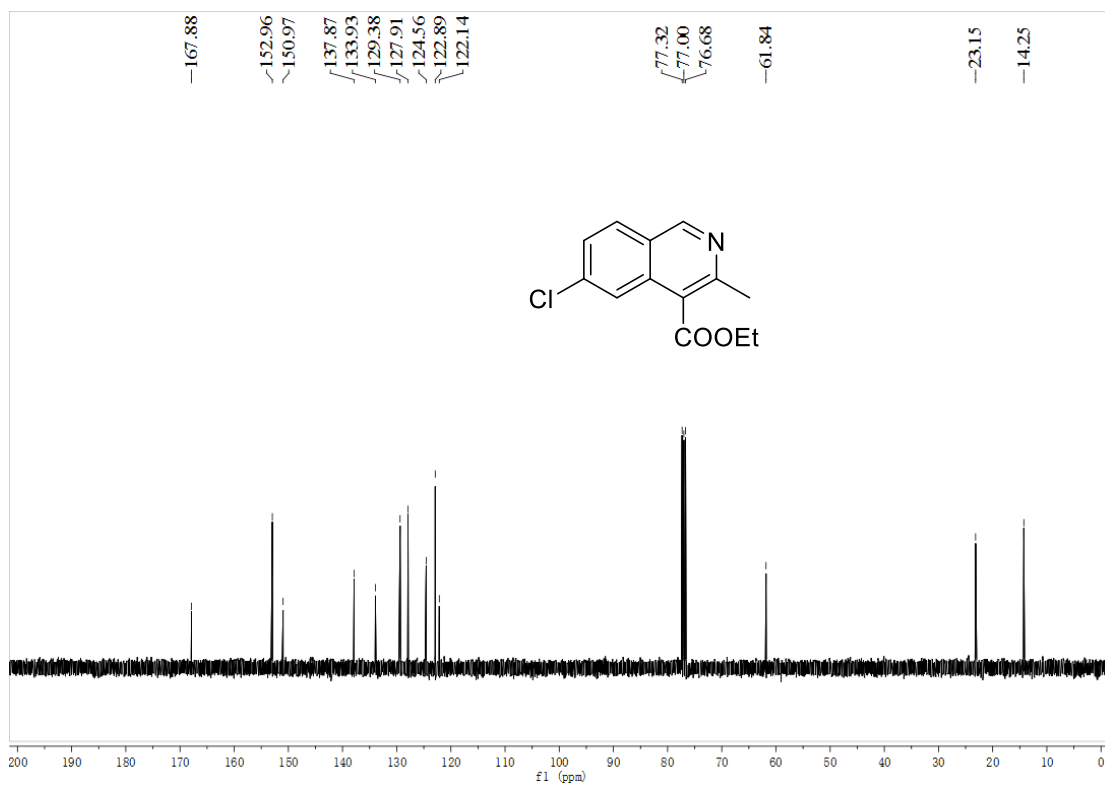

# **Ethyl 6-fluoro-3-methylisoquinoline-4-carboxylate (3ia)**

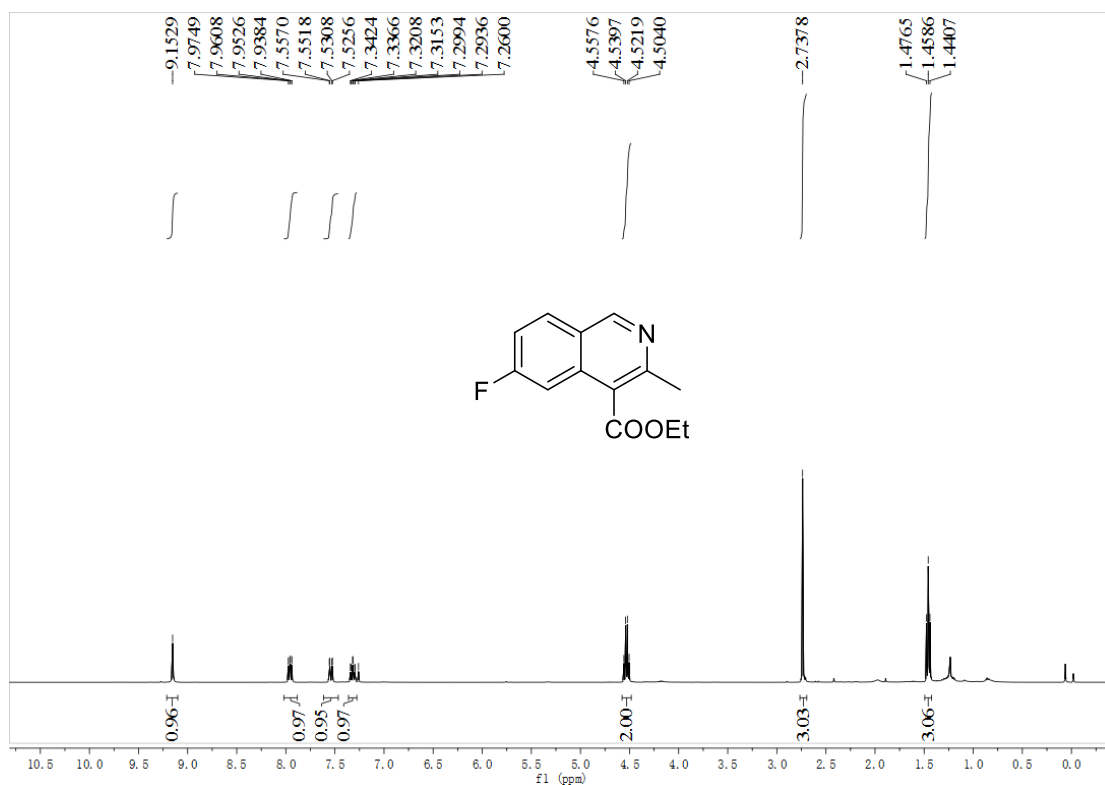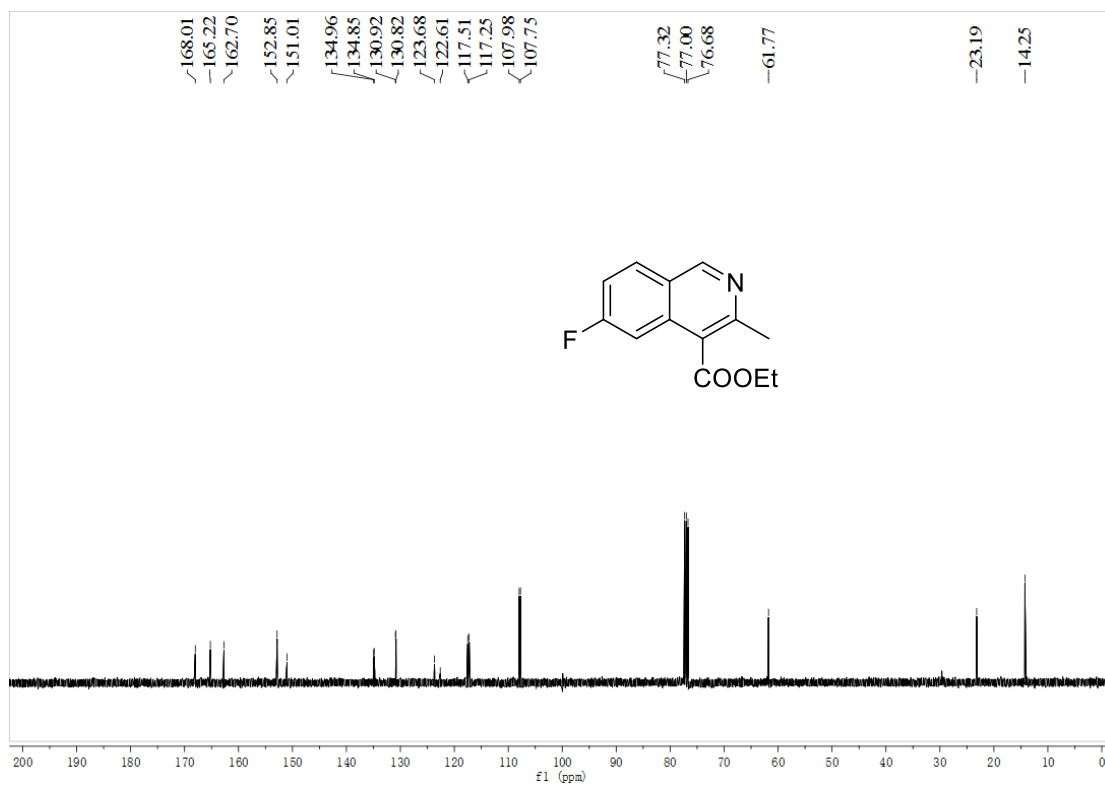

# **Ethyl 3-methyl-6-(trifluoromethyl)isoquinoline-4-carboxylate (3ja)**

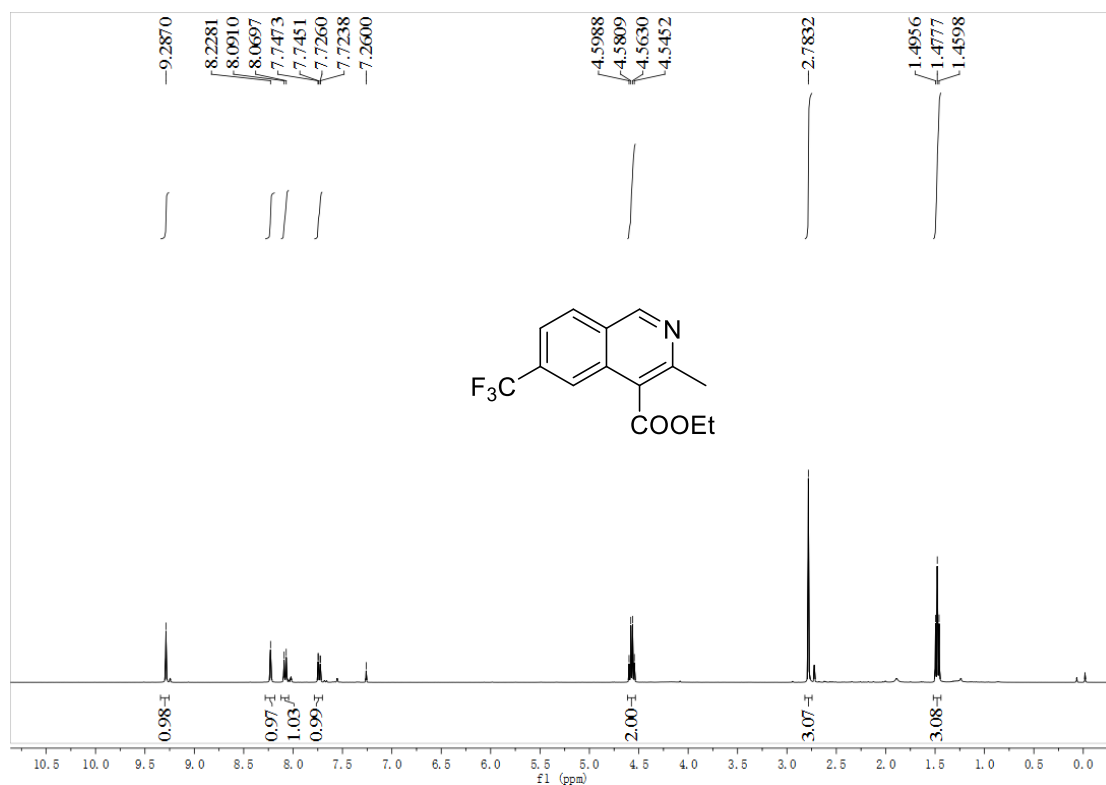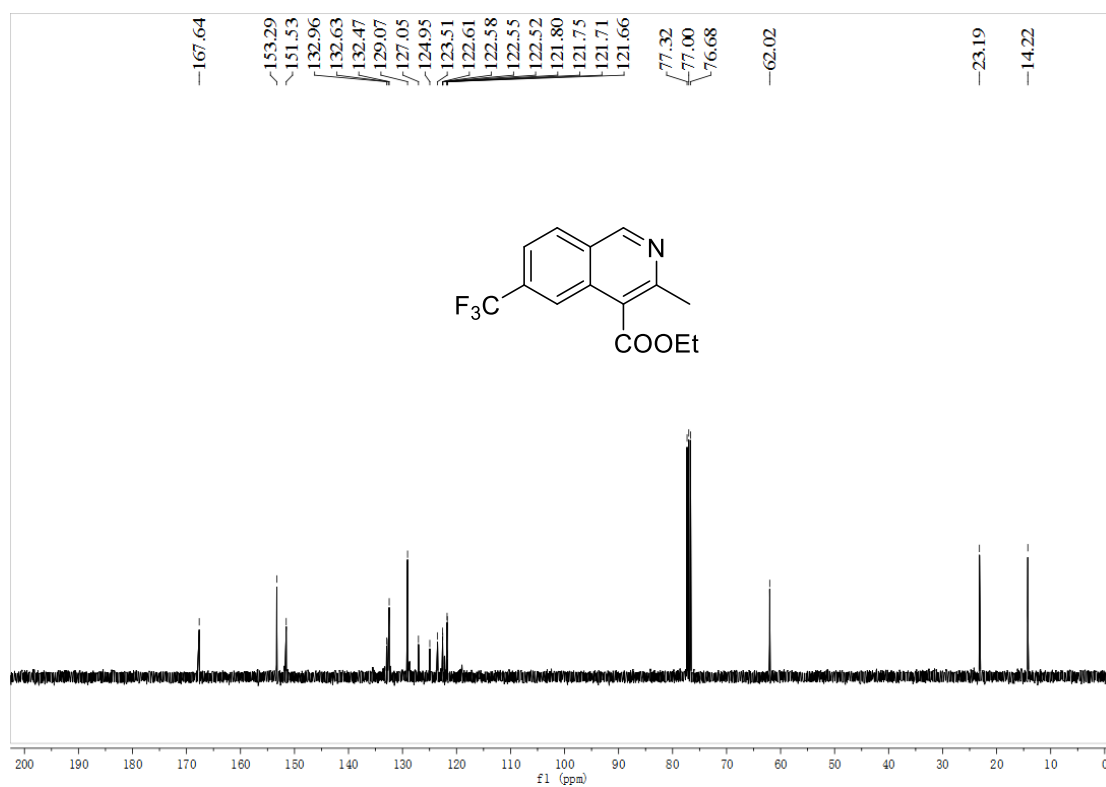

# **Ethyl 3-methylbenzo[h]isoquinoline-4-carboxylate (3ka)**

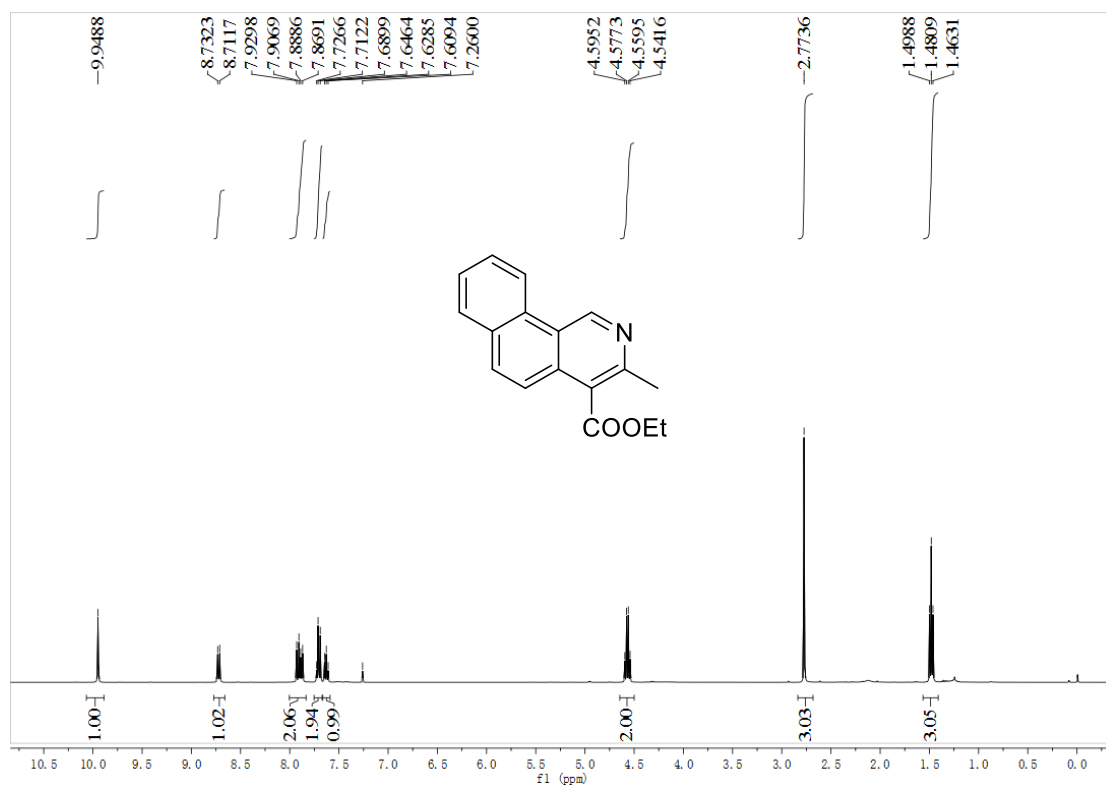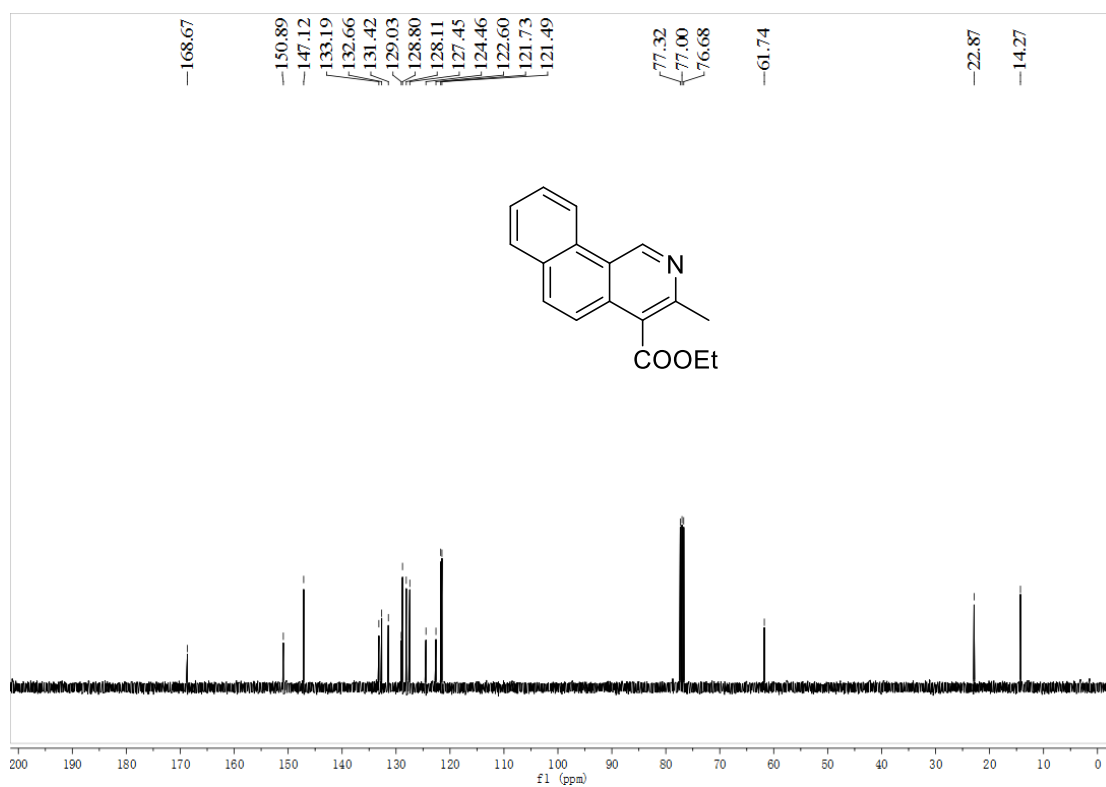

# **Ethyl 1,3-dimethylisoquinoline-4-carboxylate (3la)**

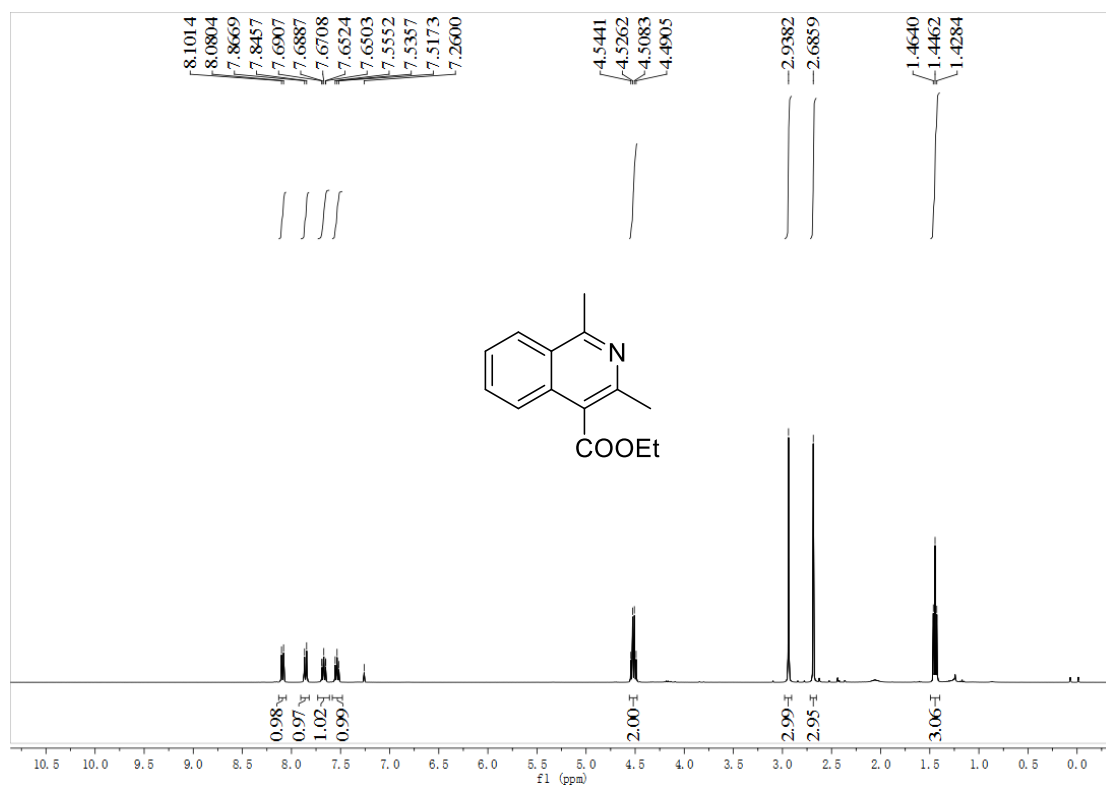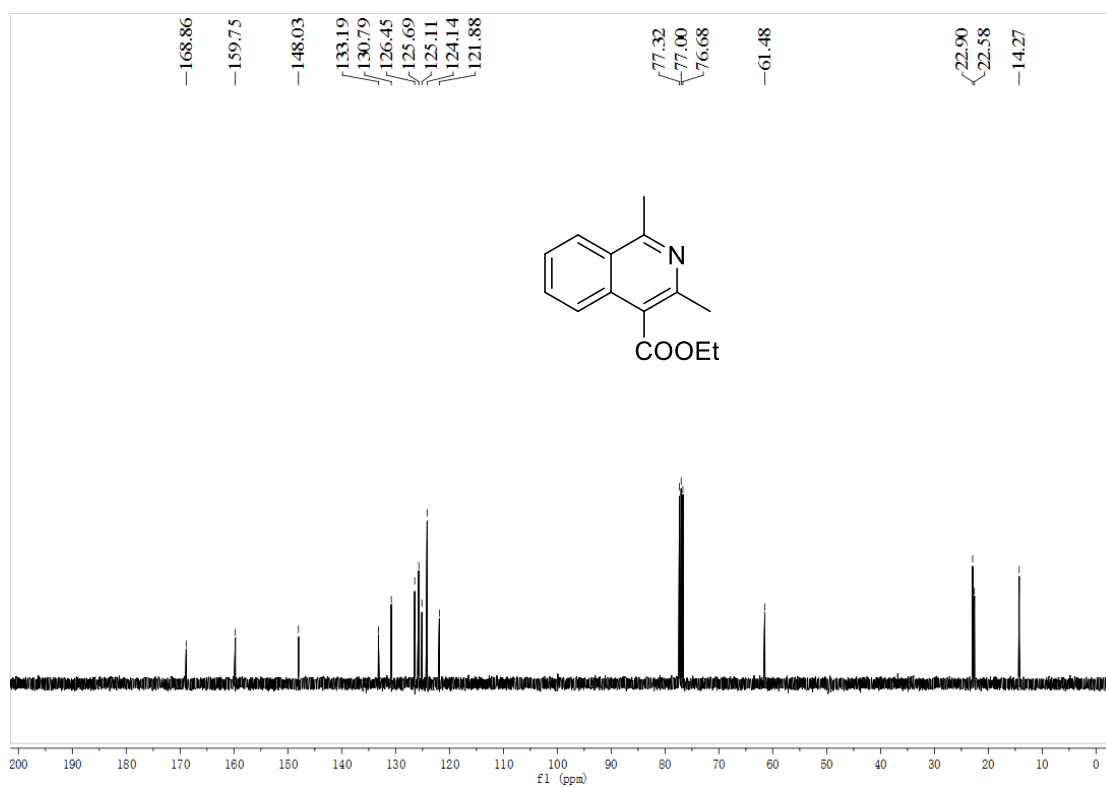

# **Ethyl 3-methyl-1-phenylisoquinoline-4-carboxylate (3ma)**

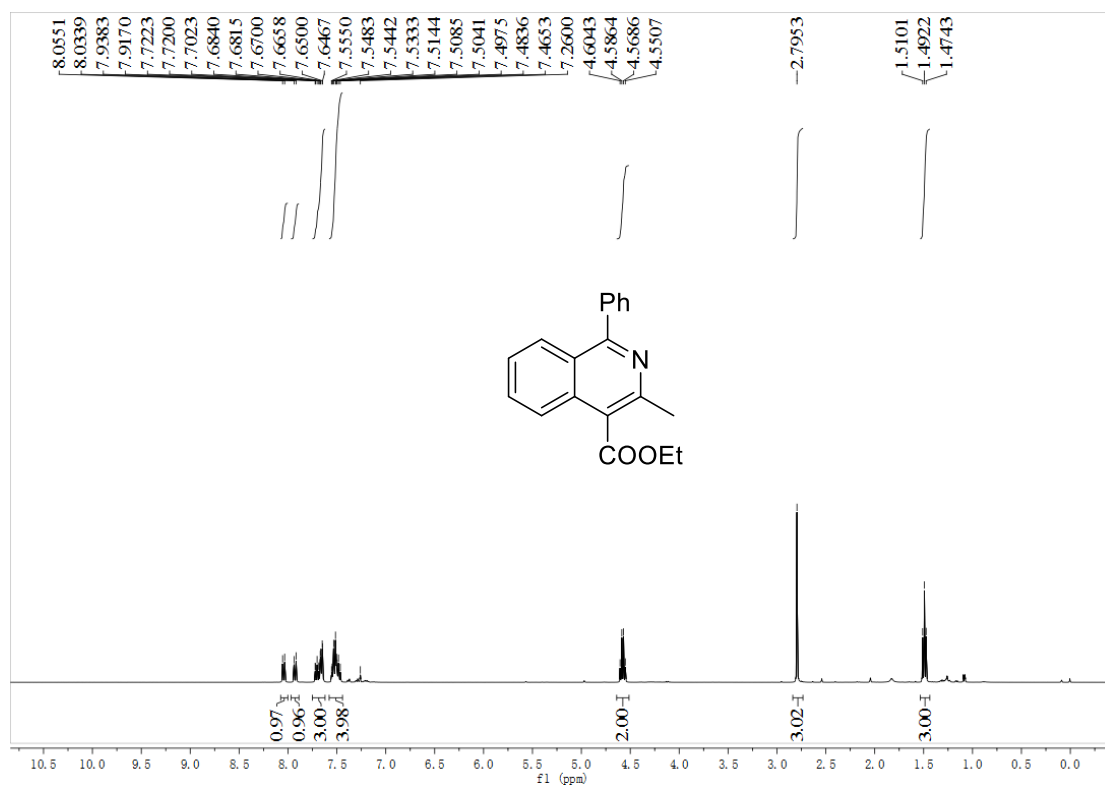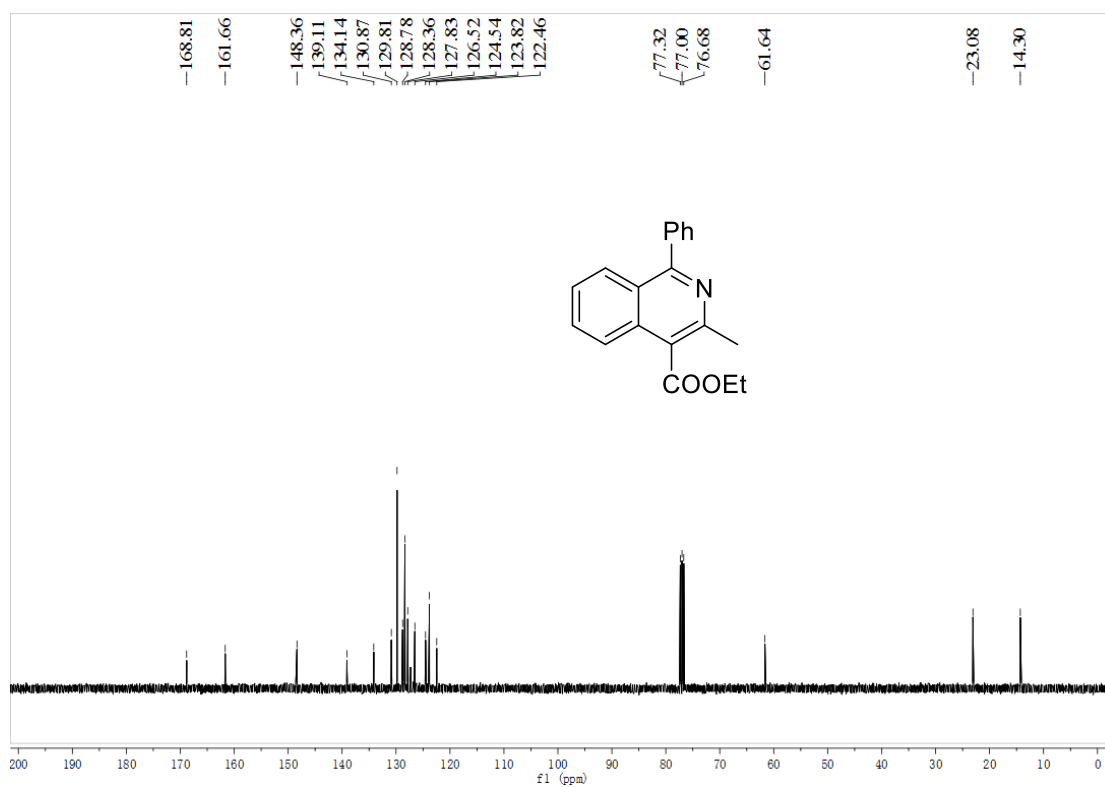

# **Ethyl 3,7-dimethylisoquinoline-4-carboxylate (3na)**

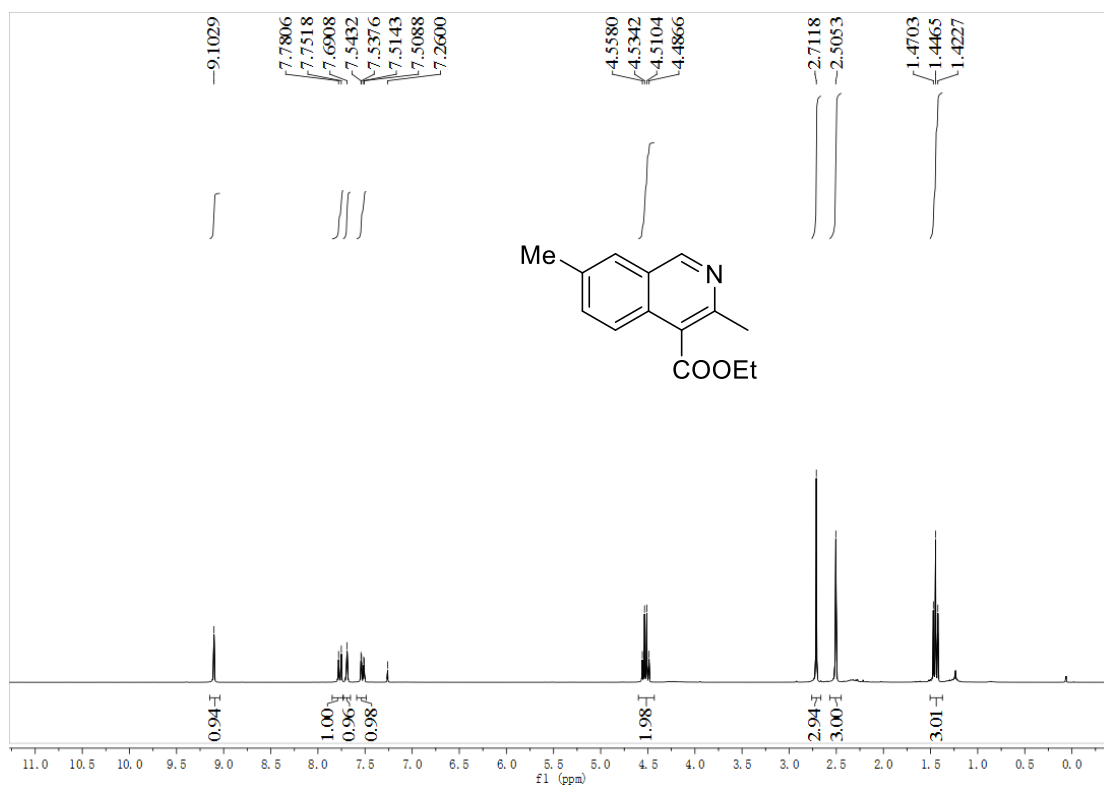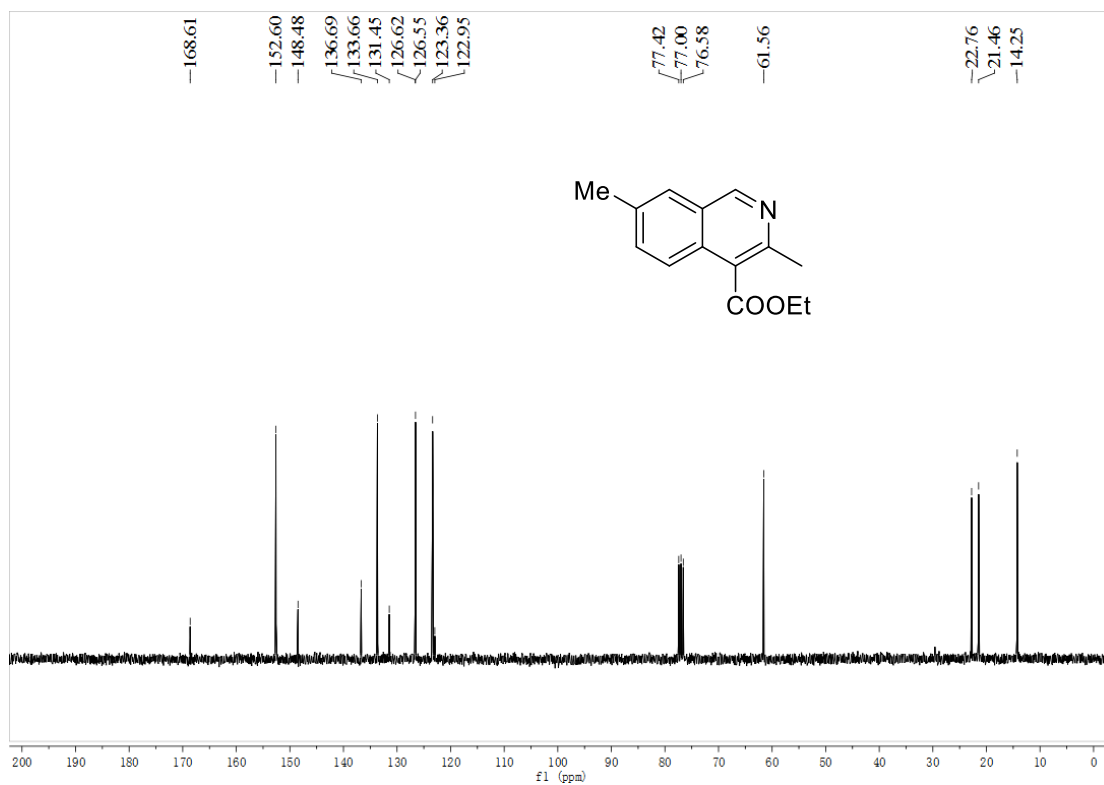

# **Methyl 3-methylisoquinoline-4-carboxylate (3ab)**

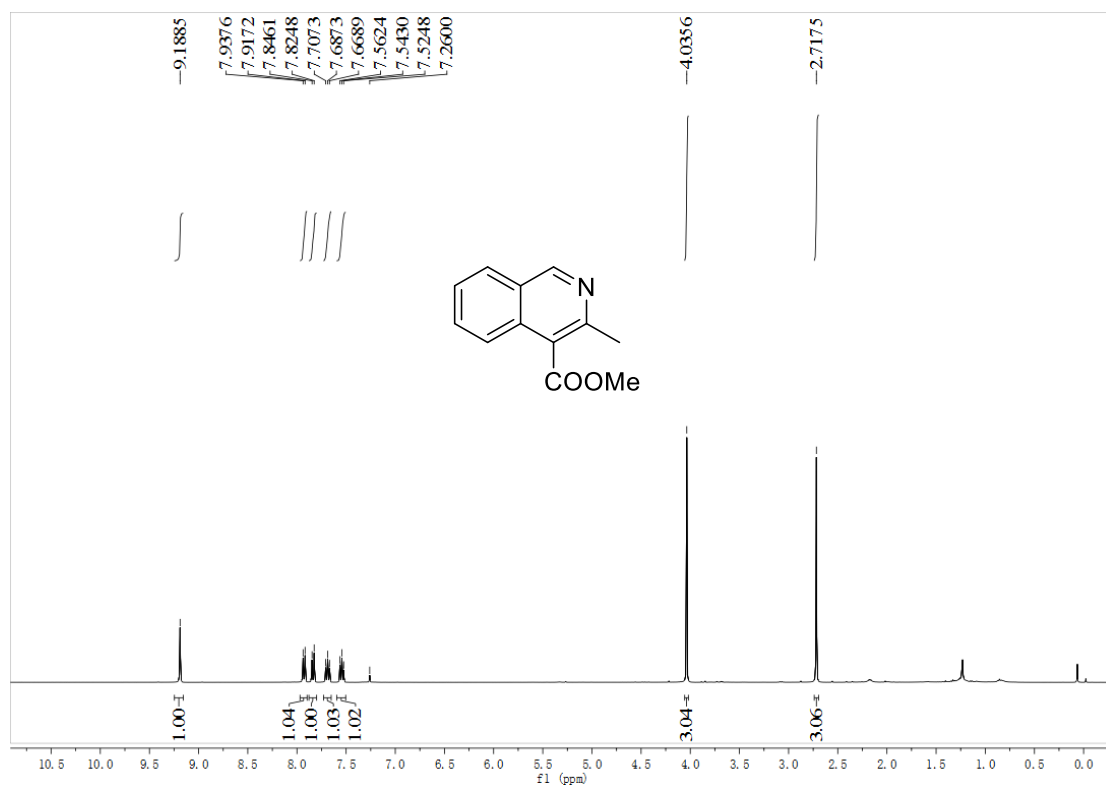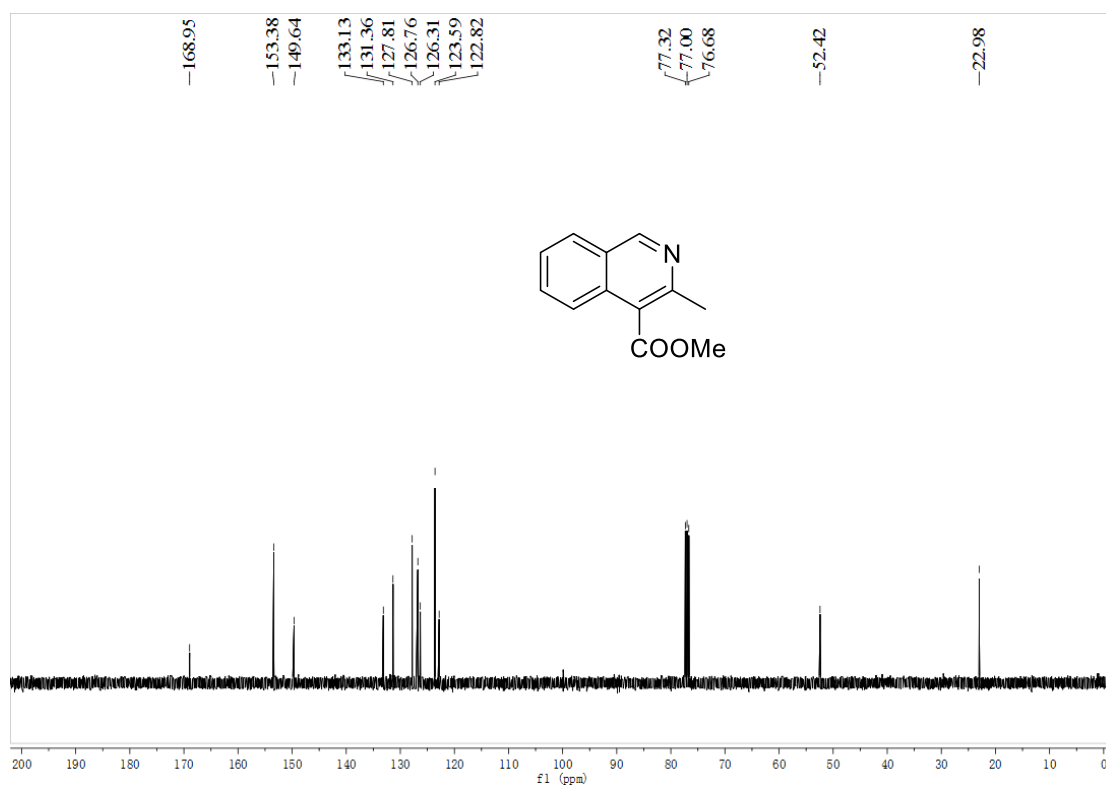

**n-Propyl 3-methylisoquinoline-4-carboxylate (3ac)**

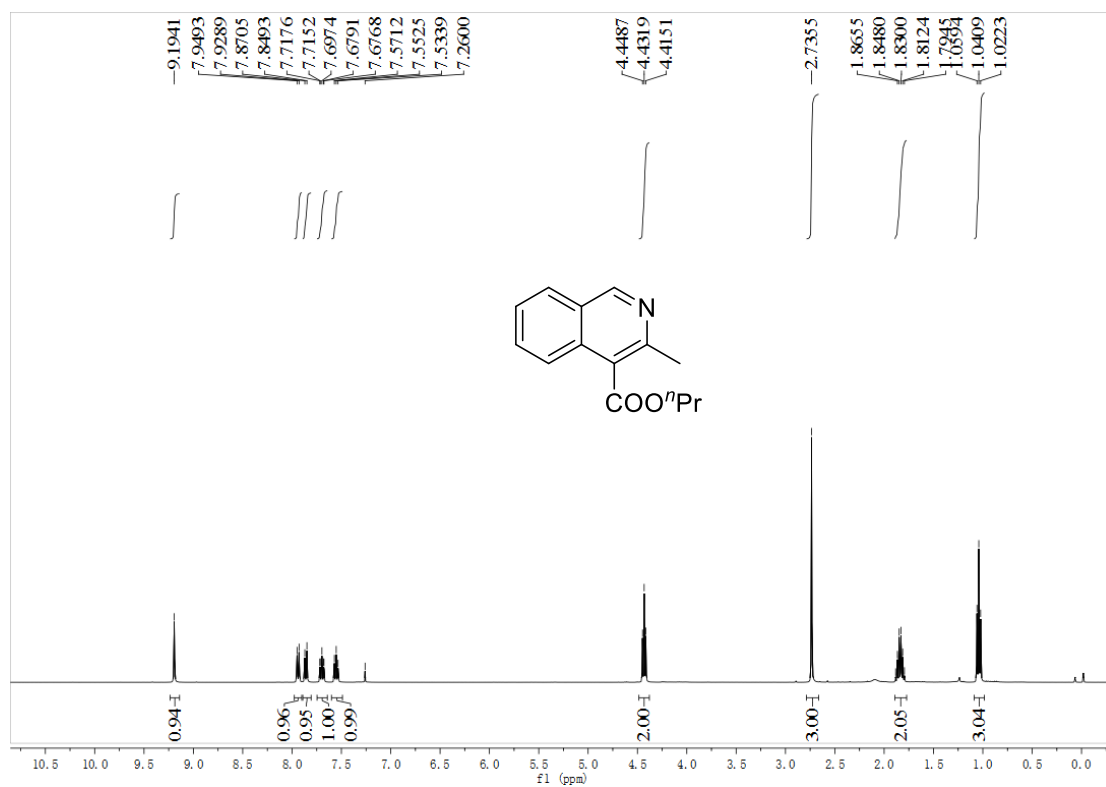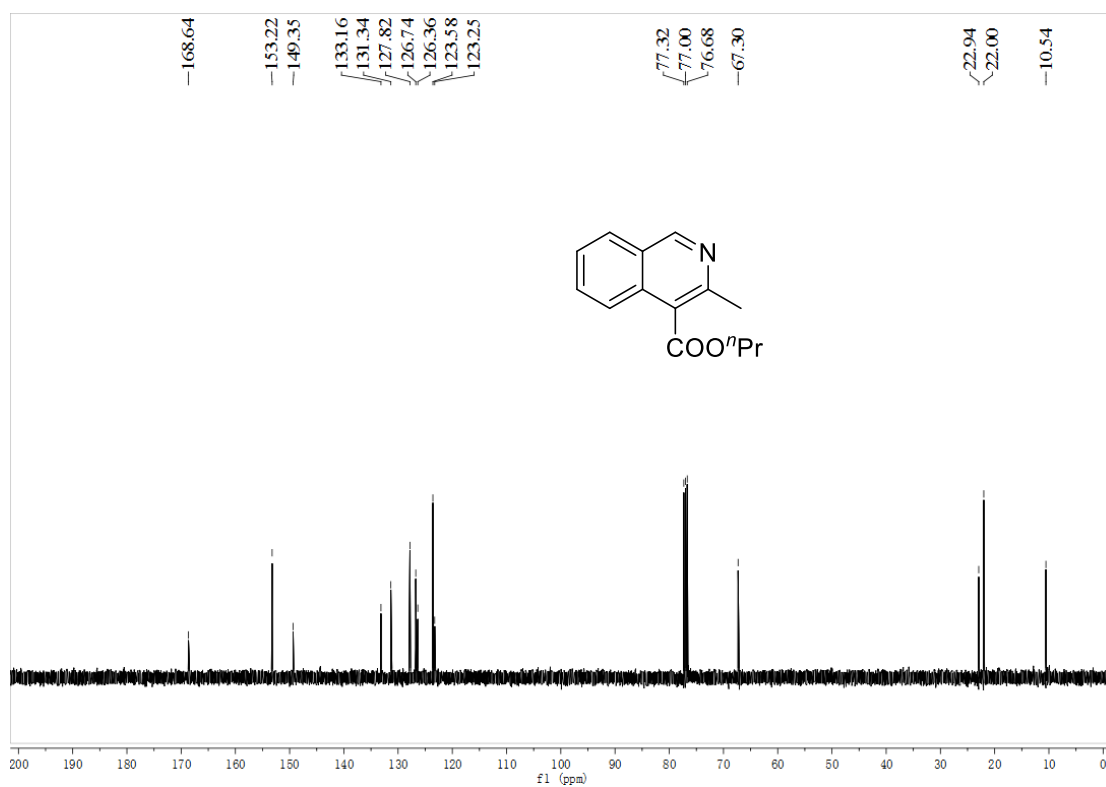

**i-Propyl 3-methylisoquinoline-4-carboxylate (3ad)**

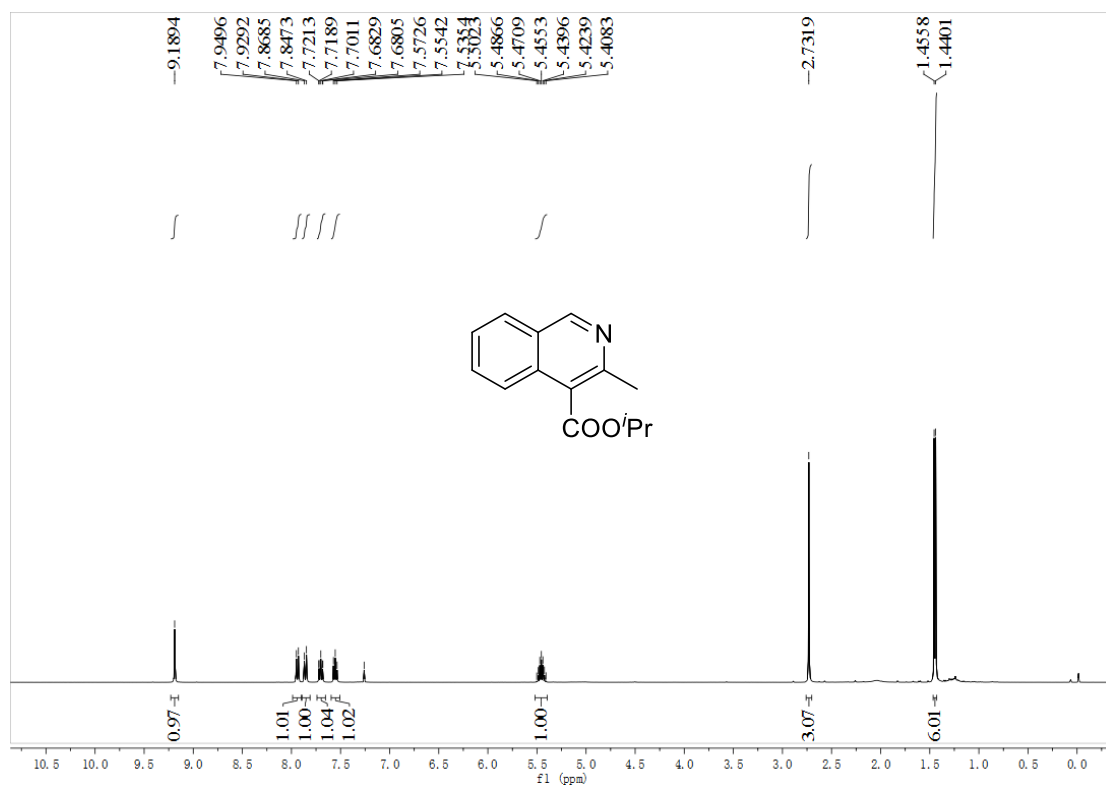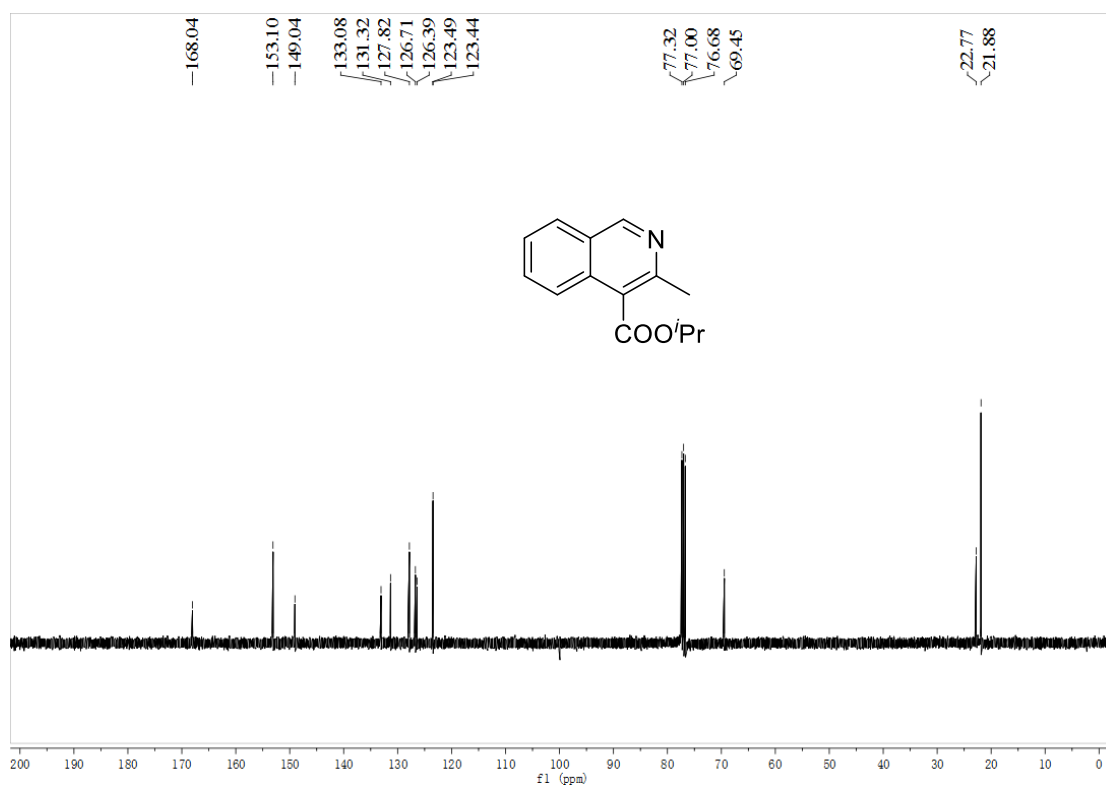

**tert-Butyl 3-methylisoquinoline-4-carboxylate (3ae)**

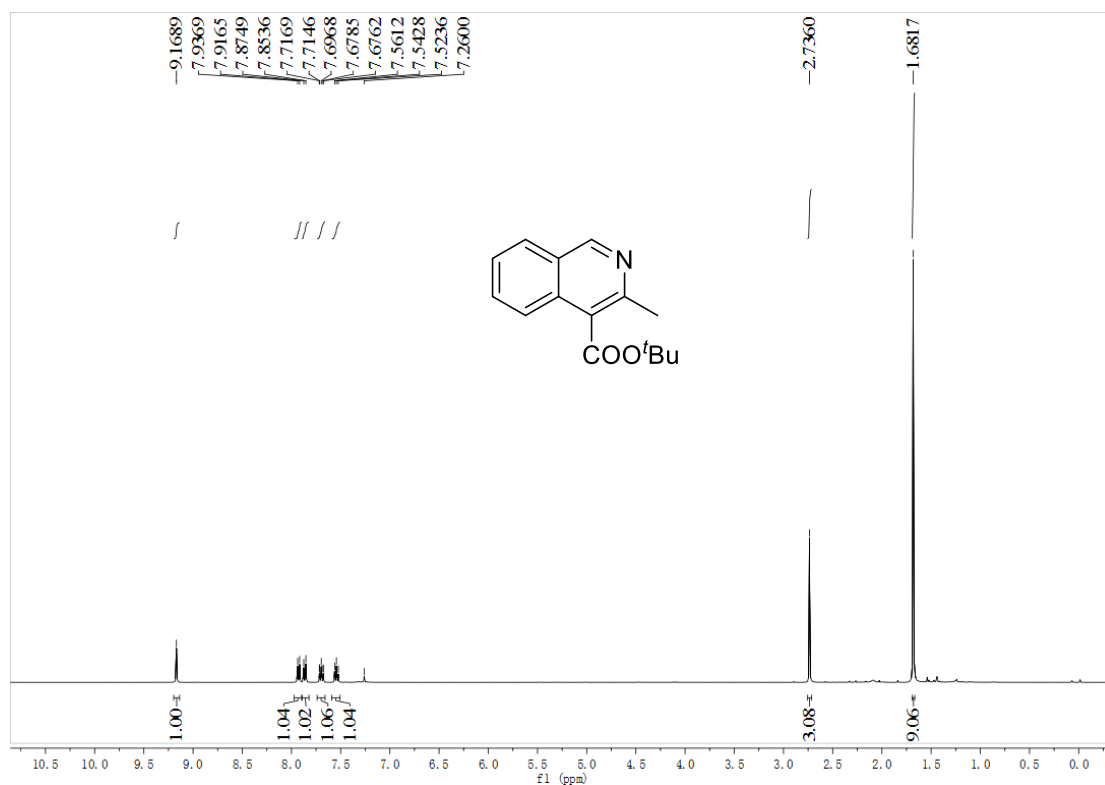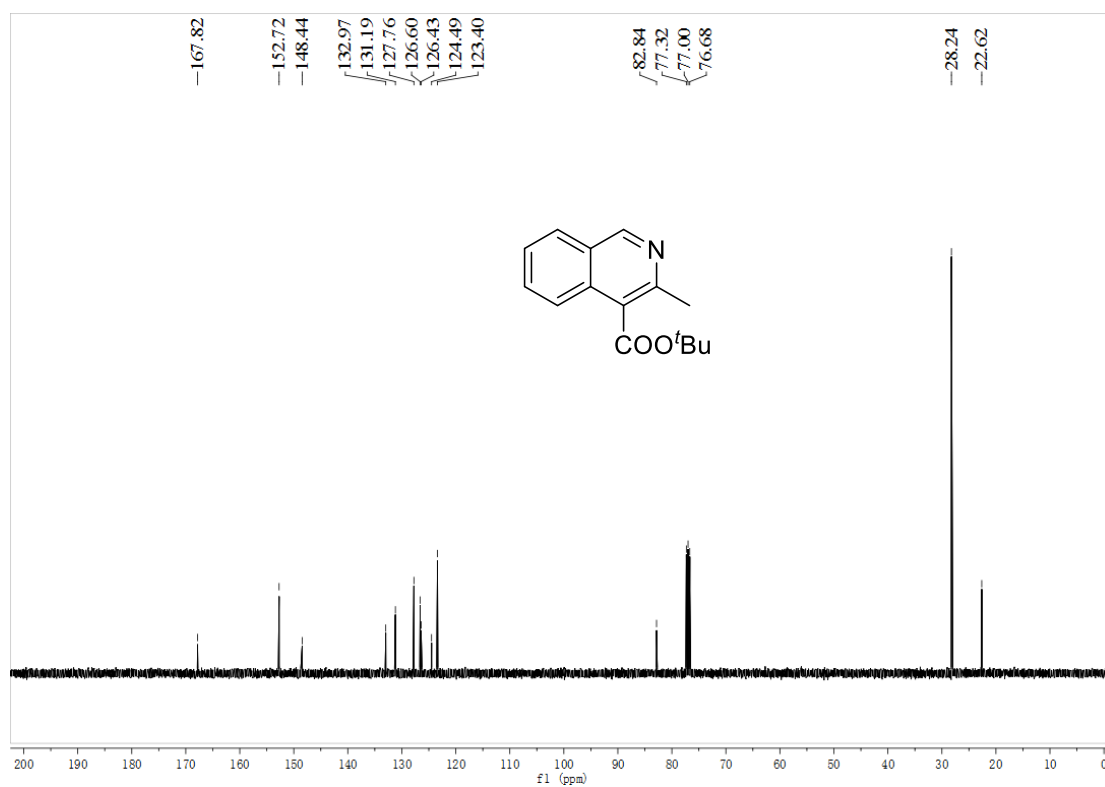

# **Benzyl 3-methyloquinoline-4-carboxylate (3af)**

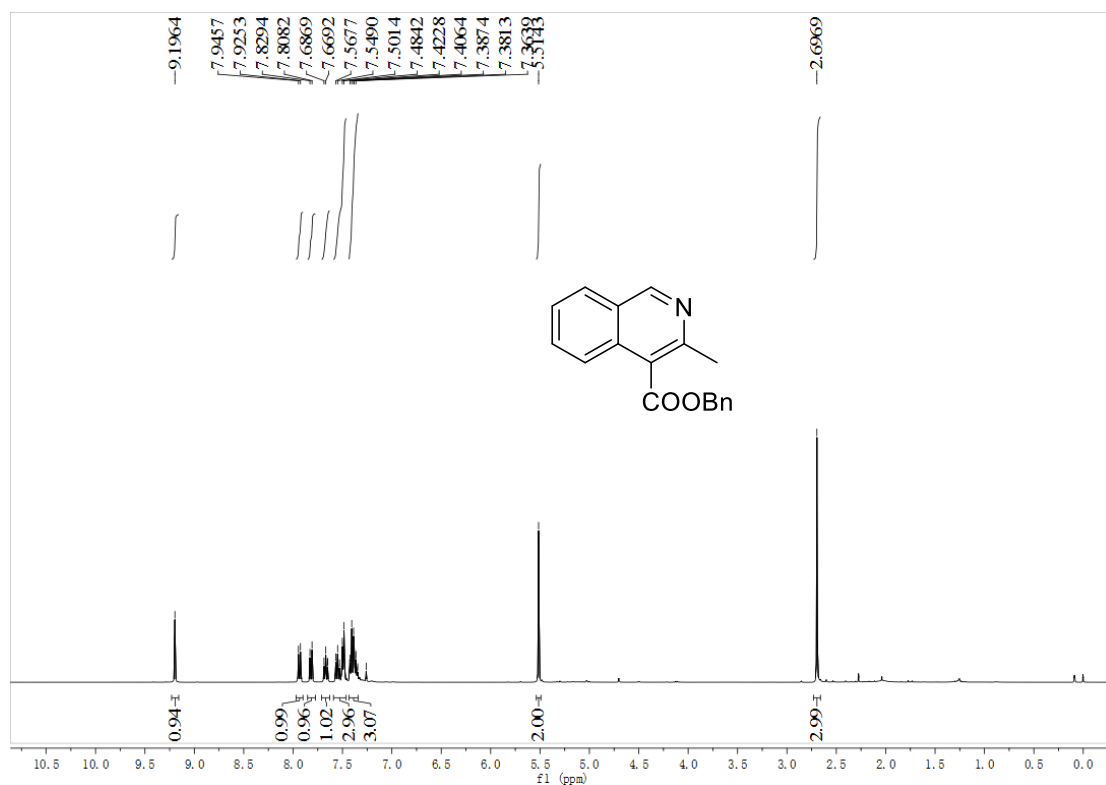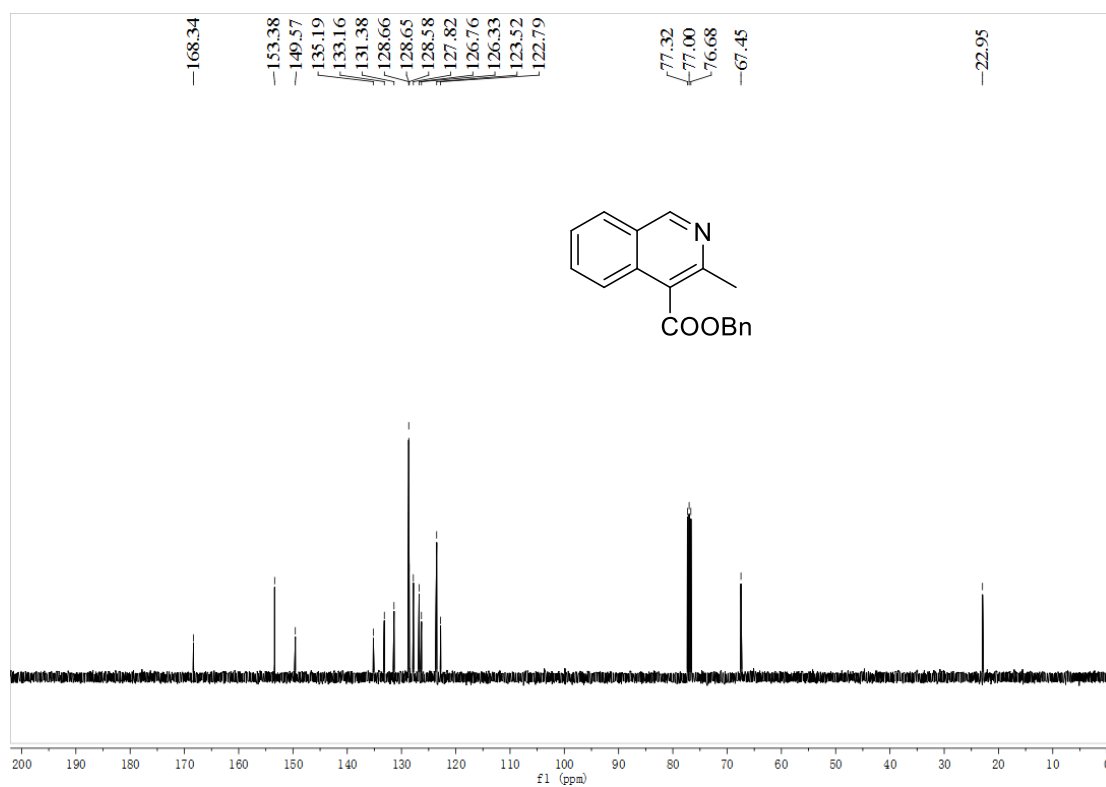

# **Ethyl 3-ethylisoquinoline-4-carboxylate (3ag)**

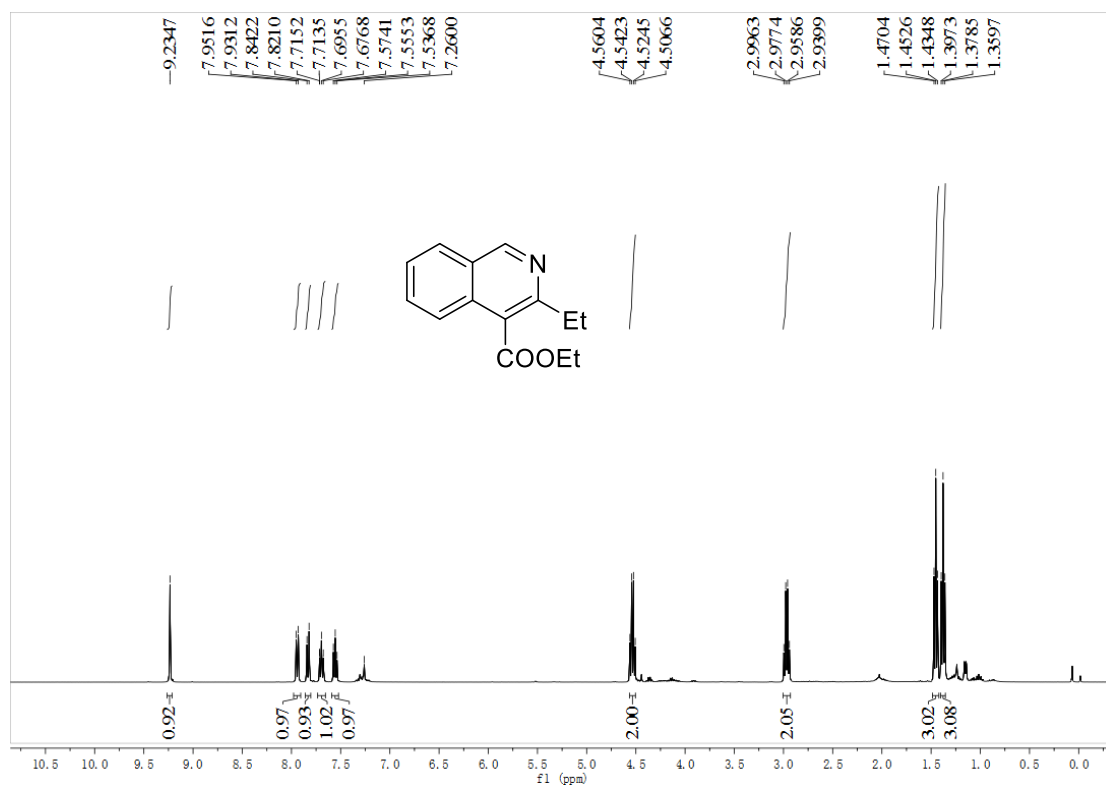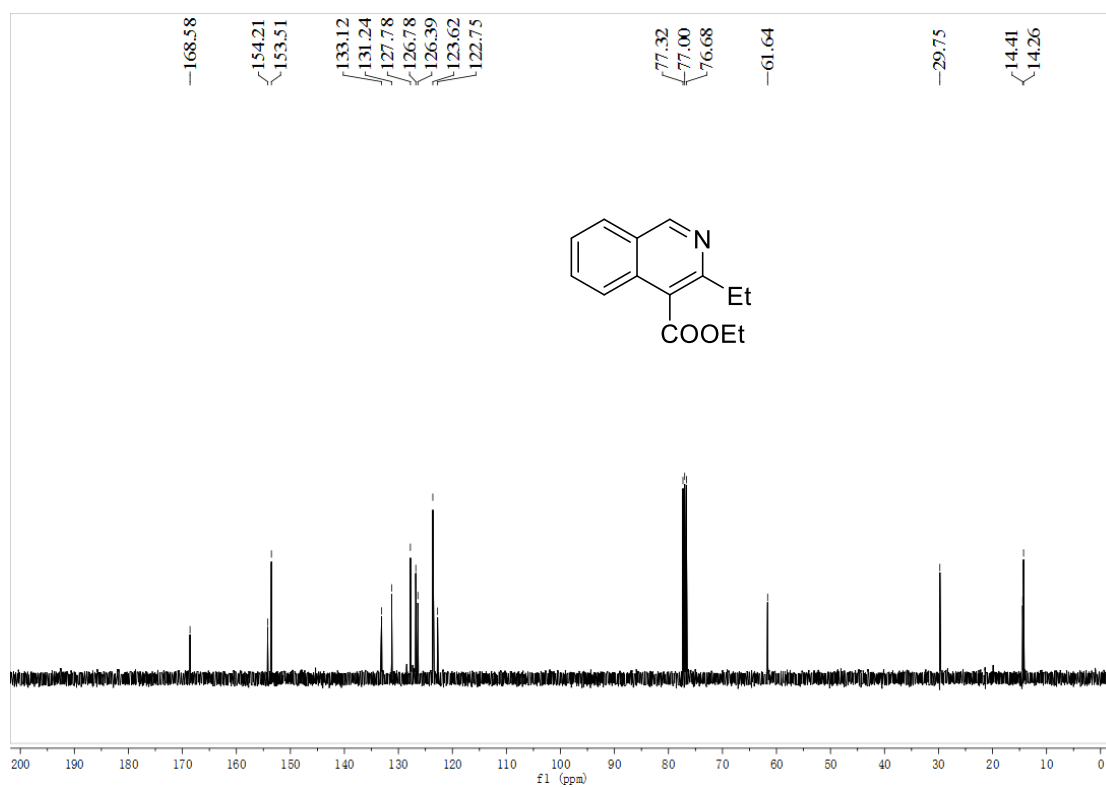

# **Ethyl 3-propylisoquinoline-4-carboxylate (3ah)**

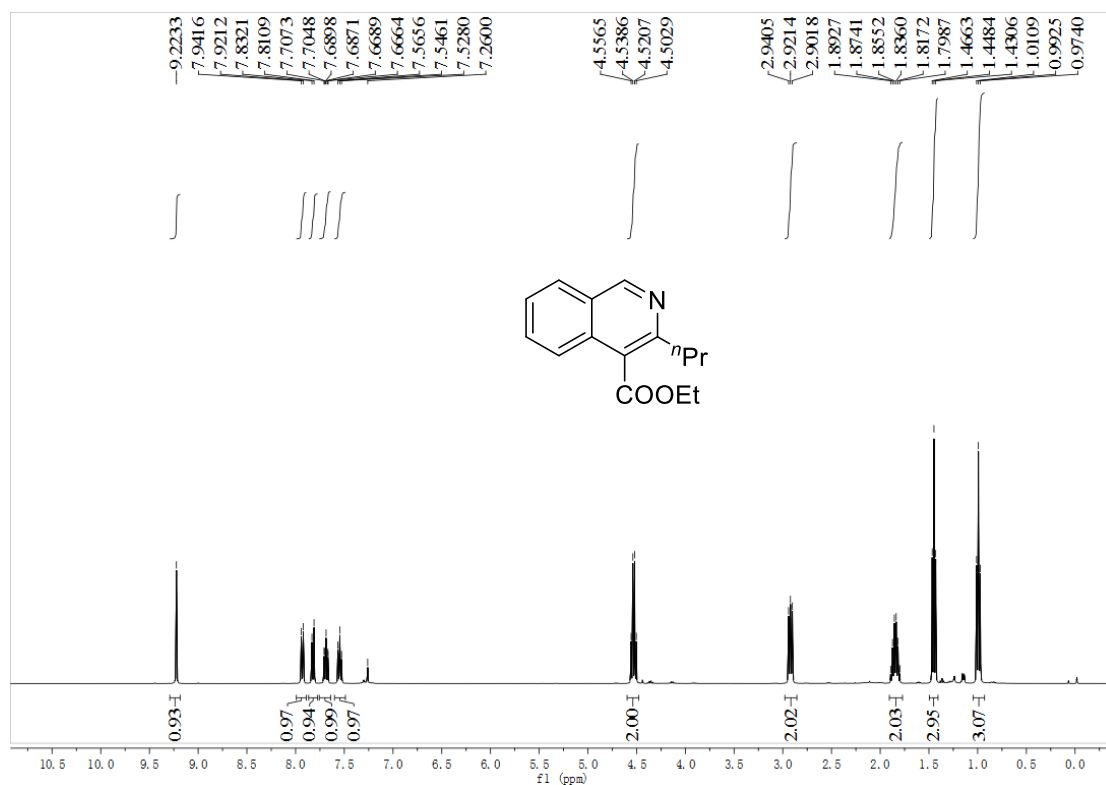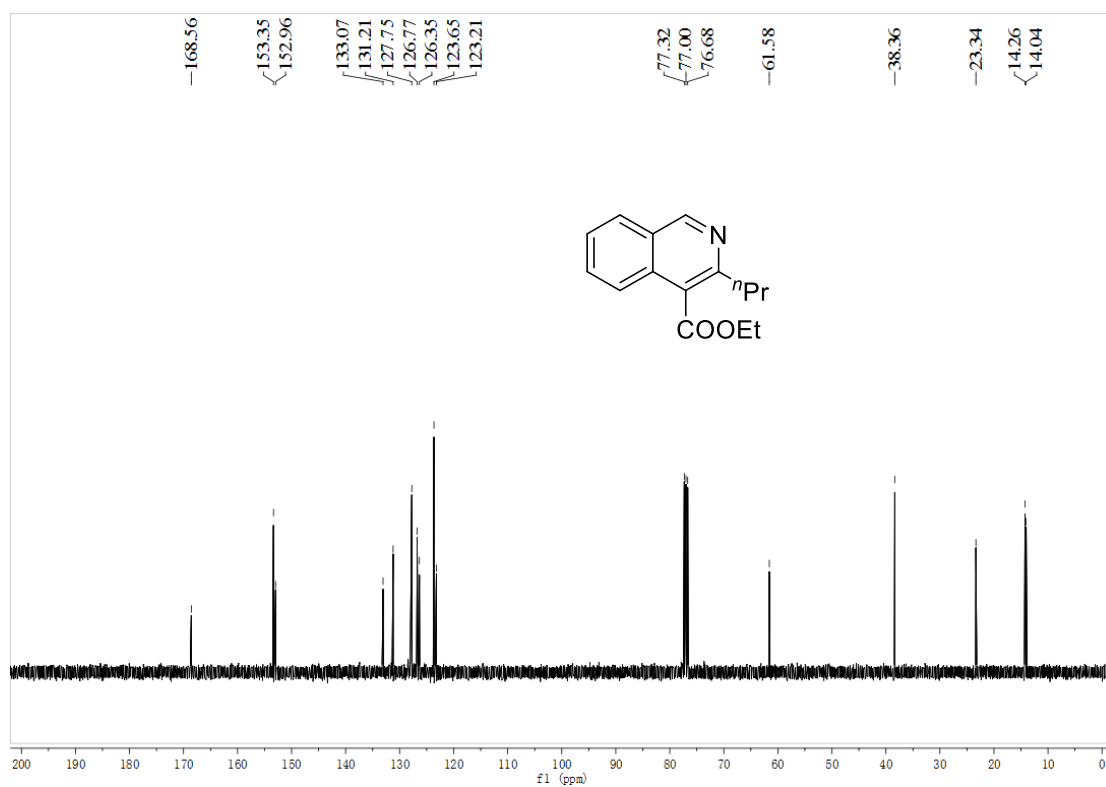

# **Ethyl 3-isopropylisoquinoline-4-carboxylate (3ai)**

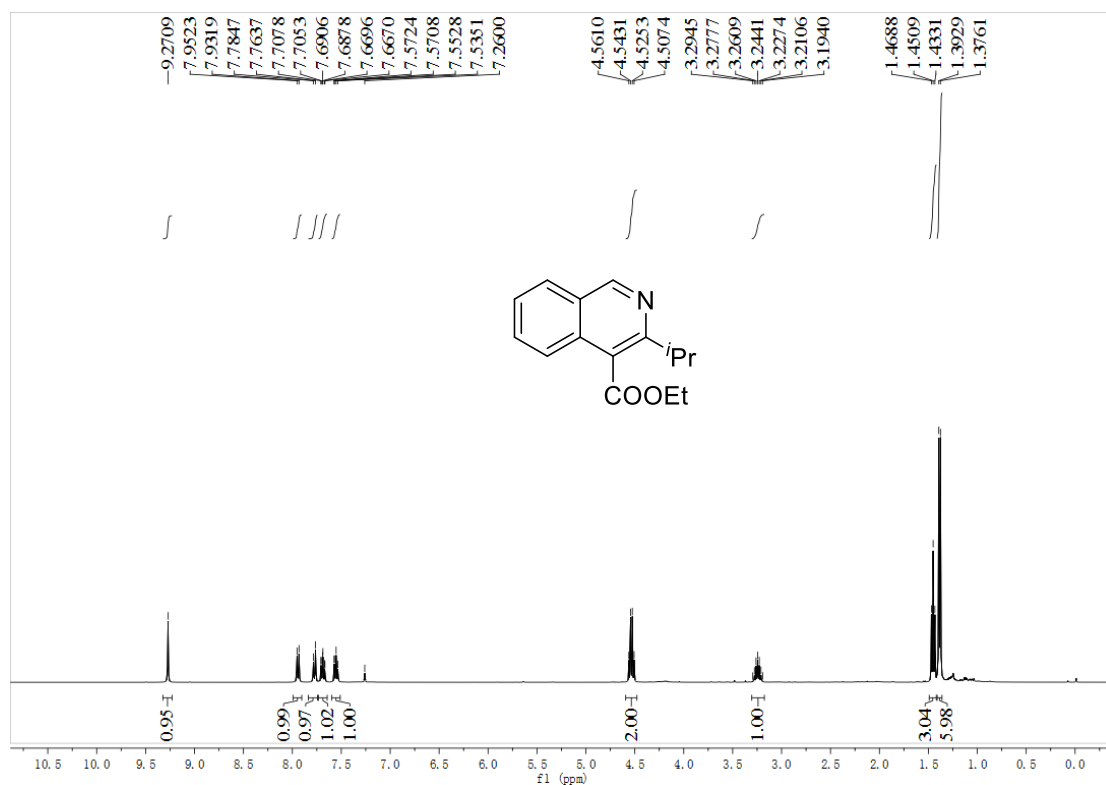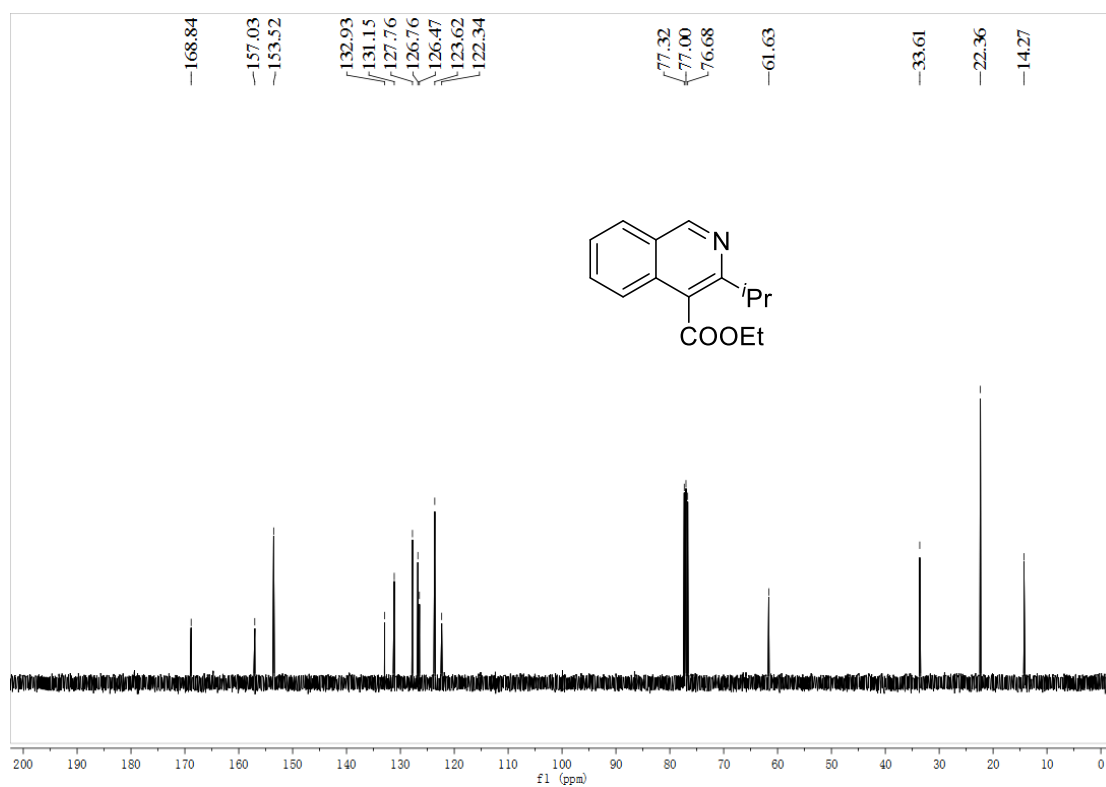

# **1-(3-Methyloquinolin-4-yl)ethan-1-one (3ak)**

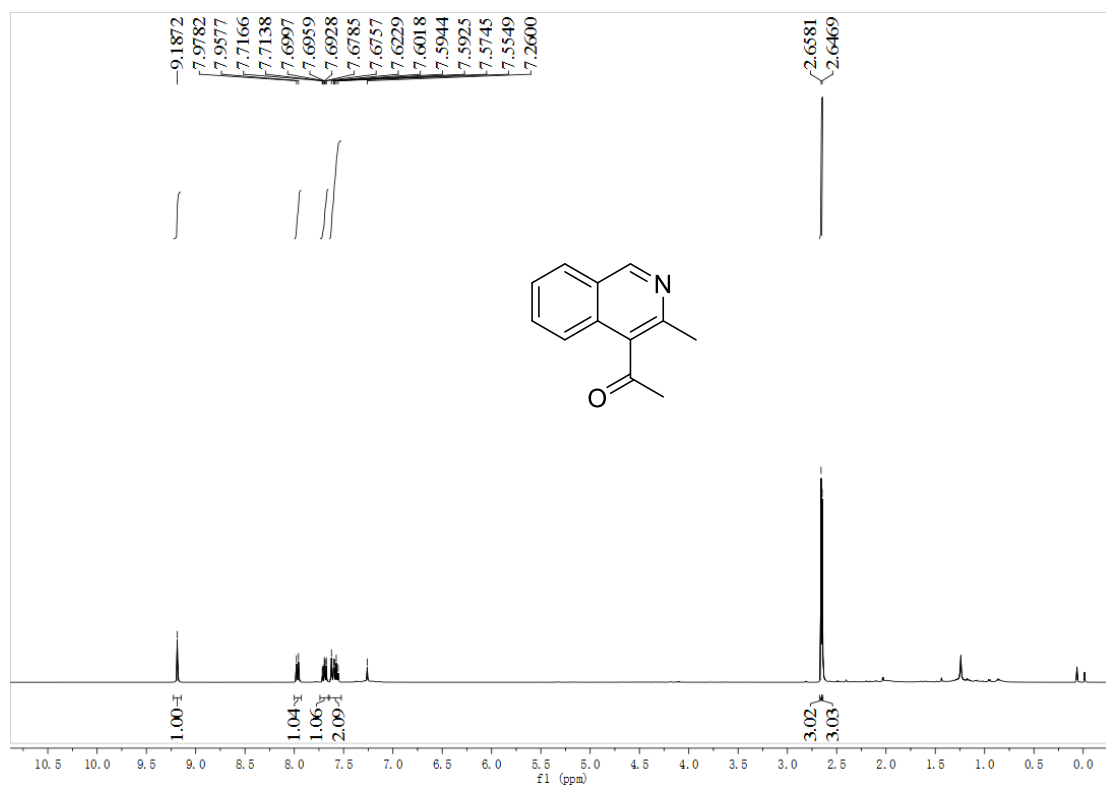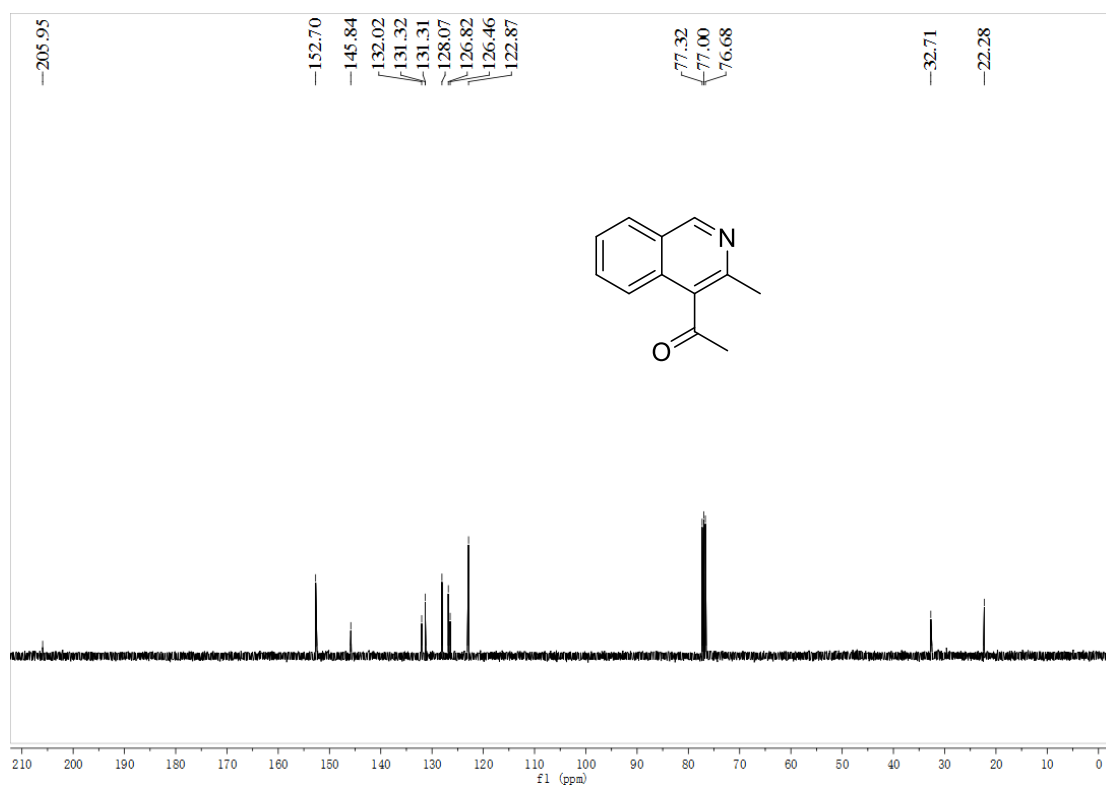

### 3,3-Dimethyl-3,4-dihydrophenanthridin-1(2H)-one (3al)

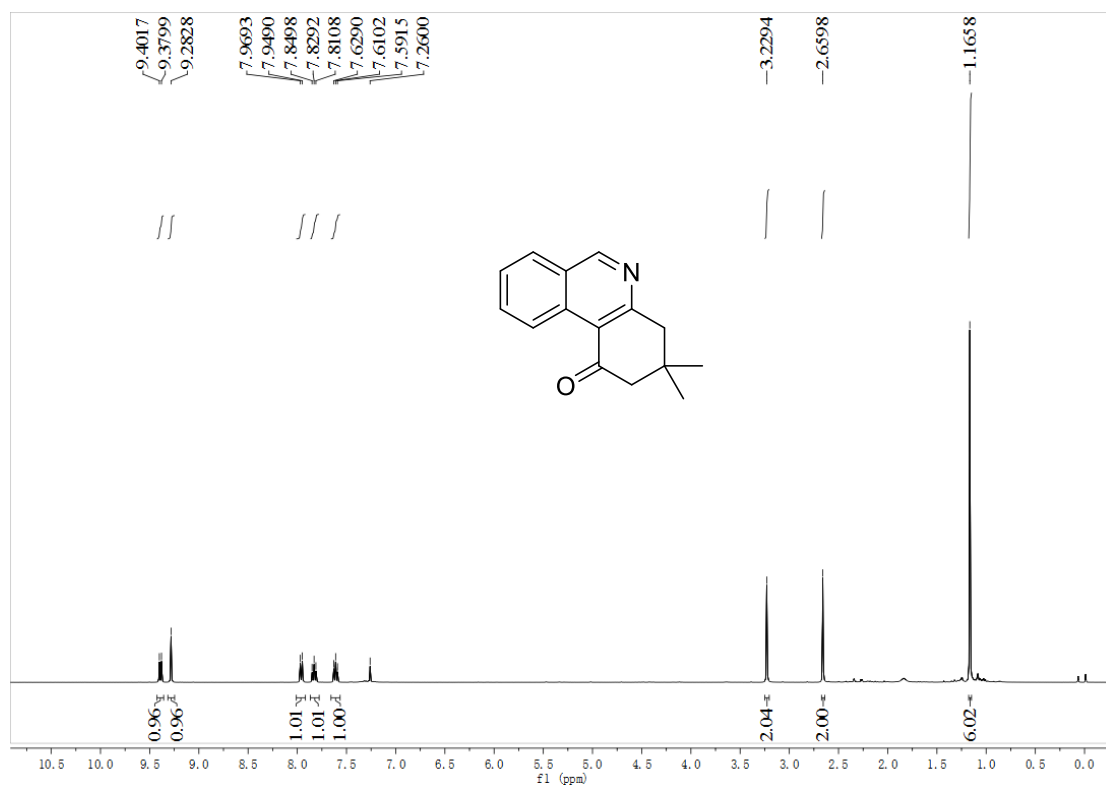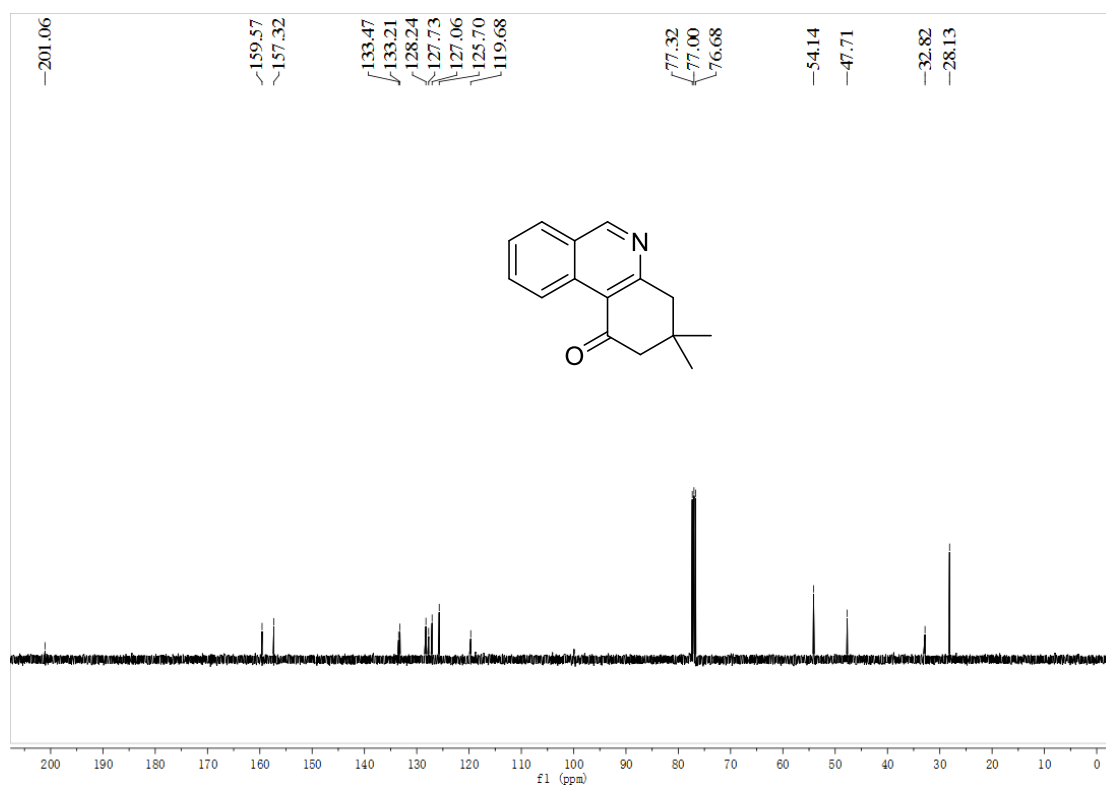

Supplement: Supplementary file 1 [file 5855835]
